# Supplementary material for: Three New Benzophenone Derivatives from Selaginella tamariscina
Source: MDPI journal article supplement (doi:10.3390/molecules28124582), 2023-06-06
Supplement: s1 [file s1]

*Supplementary Material*

## Three New Benzophenone Derivatives from *Selaginella tamariscina*

Jiayin Long <sup>1,†</sup>, Qingqing Mao <sup>1,†</sup>, Yujie Peng <sup>1</sup>, Lei Liu <sup>1</sup>, Yin Hong <sup>1</sup>, Honglin Xiang <sup>1</sup>, Ming Ma <sup>2</sup>, Hui Zou <sup>1,\*</sup>  
and Junwei Kuang <sup>2,\*</sup>

<sup>1</sup> Key Laboratory of Study and Discovery of Small Targeted Molecules of Hunan Province, School of Medicine, Hunan Normal University, Changsha 410013, China; 202020191549@hunnu.edu.cn (J.L.); 202020191550@hunnu.edu.cn (Q.M.); 202130192065@hunnu.edu.cn (Y.P.); 201930192015@smail.hunnu.edu.cn (L.L.); 01930192016@hunnu.edu.cn (Y.H.); 13828@hunnu.edu.cn (H.X.)

<sup>2</sup> Key Laboratory of Phytochemical R&D of Hunan Province, Key Laboratory of Chemical Biology & Traditional Chinese Medicine Research of Ministry of Education, College of Chemistry and Chemical Engineering, Hunan Normal University, Changsha 410081, China; mingma@hunnu.edu.cn

\* Correspondence: zouhui@hunnu.edu.cn (H.Z.); willkuang@hunnu.edu.cn (J.K.)

† These authors contributed equally to this work.

---

| Tables of Contents                                                                      | page |
|-----------------------------------------------------------------------------------------|------|
| <b>Figure S1:</b> $^1\text{H}$ NMR spectrum of <b>1</b> in MeOH- $d_4$ (400 MHz)        | 3    |
| <b>Figure S2:</b> $^{13}\text{C}$ NMR spectrum of <b>1</b> in MeOH- $d_4$ (100 MHz)     | 4    |
| <b>Figure S3:</b> $^1\text{H}$ - $^1\text{H}$ COSY spectrum of <b>1</b> in MeOH- $d_4$  | 5    |
| <b>Figure S4:</b> HSQC spectrum of <b>1</b> in MeOH- $d_4$                              | 6    |
| <b>Figure S5:</b> HMBC spectrum of <b>1</b> in MeOH- $d_4$                              | 7    |
| <b>Figure S6:</b> HR-ESI-MS sepctrum of <b>1</b>                                        | 8    |
| <b>Figure S7:</b> $^1\text{H}$ NMR spectrum of <b>2</b> in MeOH- $d_4$ (400 MHz)        | 9    |
| <b>Figure S8:</b> $^{13}\text{C}$ NMR spectrum of <b>2</b> in MeOH- $d_4$ (100 MHz)     | 10   |
| <b>Figure S9:</b> DEPT spectrum of <b>2</b> in MeOH- $d_4$ (100 MHz)                    | 11   |
| <b>Figure S10:</b> $^1\text{H}$ - $^1\text{H}$ COSY spectrum of <b>2</b> in MeOH- $d_4$ | 12   |
| <b>Figure S11:</b> HSQC spectrum of <b>2</b> in MeOH- $d_4$                             | 13   |
| <b>Figure S12:</b> HMBC spectrum of <b>2</b> in MeOH- $d_4$                             | 14   |
| <b>Figure S13:</b> HR-ESI-MS sepctrum of <b>2</b>                                       | 15   |
| <b>Figure S14:</b> $^1\text{H}$ NMR spectrum of <b>3</b> in MeOH- $d_4$ (400 MHz)       | 16   |
| <b>Figure S15:</b> $^{13}\text{C}$ NMR spectrum of <b>3</b> in MeOH- $d_4$ (100 MHz)    | 17   |
| <b>Figure S16:</b> $^1\text{H}$ - $^1\text{H}$ COSY spectrum of <b>3</b> in MeOH- $d_4$ | 18   |
| <b>Figure S17:</b> HSQC spectrum of <b>3</b> in MeOH- $d_4$                             | 19   |
| <b>Figure S18:</b> HMBC spectrum of <b>3</b> in MeOH- $d_4$                             | 20   |
| <b>Figure S19:</b> HR-ESI-MS sepctrum of <b>3</b>                                       | 21   |
| <b>Figure S20:</b> $^1\text{H}$ NMR spectrum of <b>4</b> in MeOH- $d_4$ (400 MHz)       | 22   |
| <b>Figure S21:</b> $^{13}\text{C}$ NMR spectrum of <b>4</b> in MeOH- $d_4$ (100 MHz)    | 23   |
| <b>Figure S22:</b> $^1\text{H}$ NMR spectrum of <b>5</b> in MeOH- $d_4$ (400 MHz)       | 24   |
| <b>Figure S23:</b> $^{13}\text{C}$ NMR spectrum of <b>5</b> in MeOH- $d_4$ (100 MHz)    | 25   |
| <b>Figure S24:</b> $^1\text{H}$ NMR spectrum of <b>6</b> in MeOH- $d_4$ (400 MHz)       | 26   |
| <b>Figure S25:</b> $^{13}\text{C}$ NMR spectrum of <b>6</b> in MeOH- $d_4$ (100 MHz)    | 27   |

---

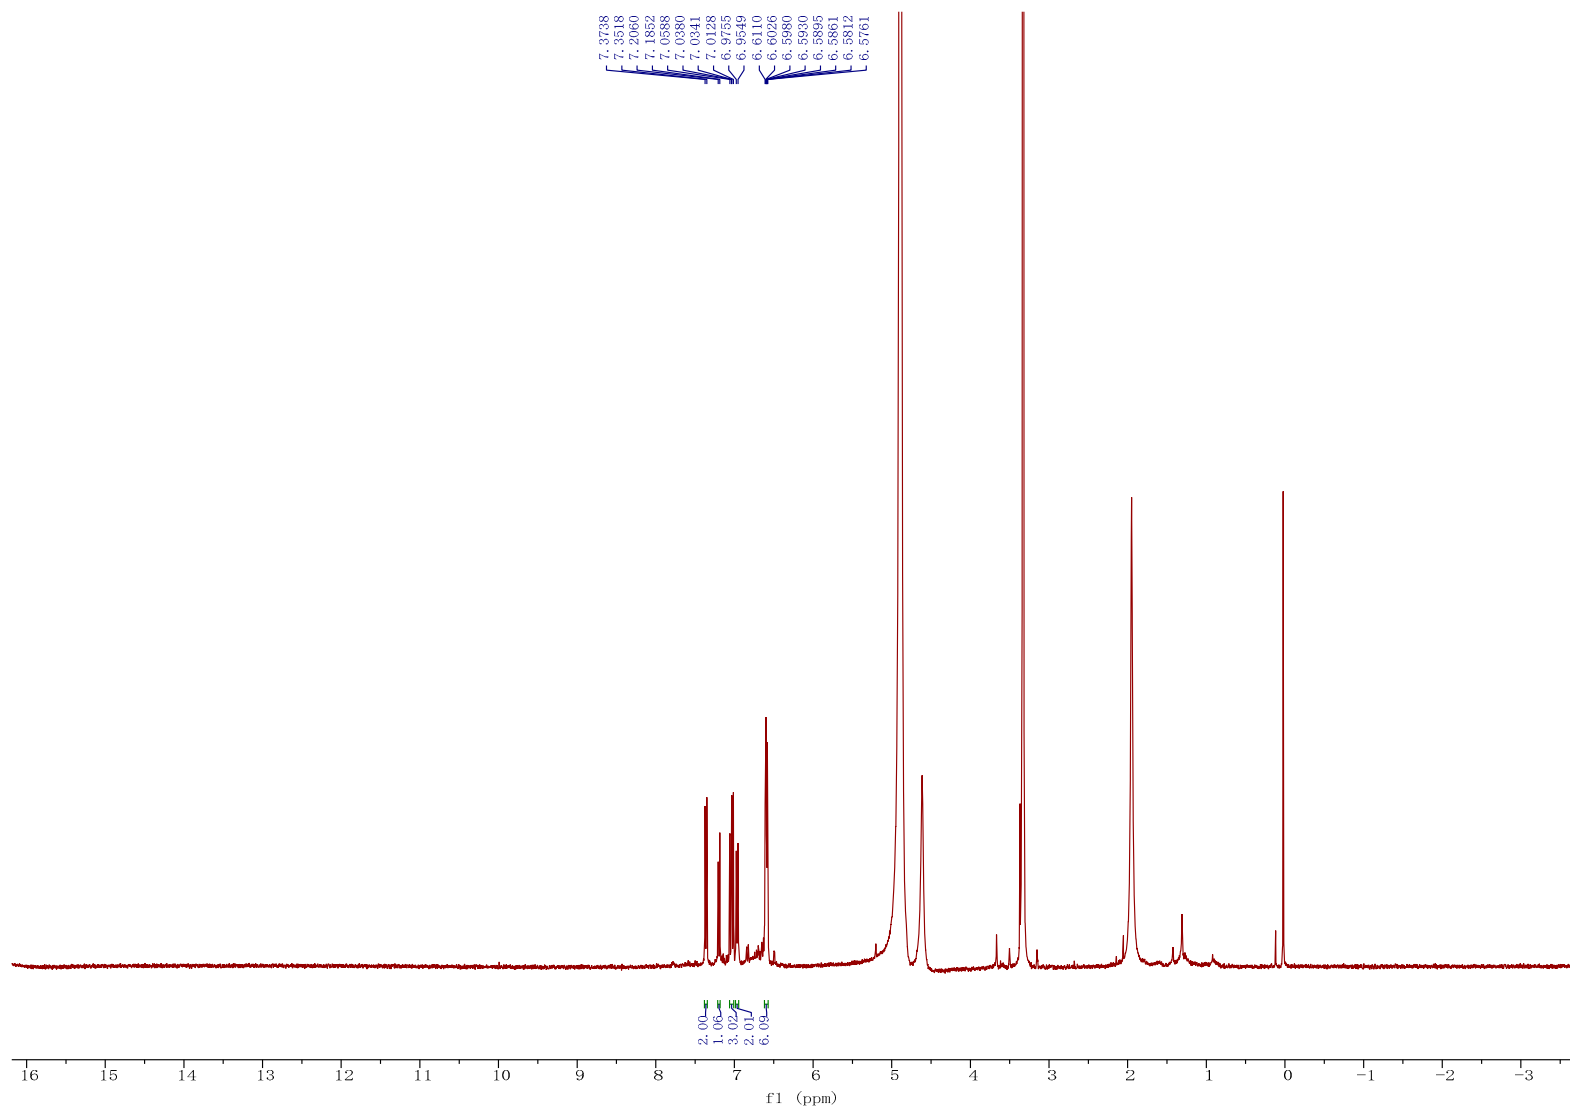

**Figure S1:**  $^1\text{H}$  NMR spectrum of **1** in  $\text{MeOH-}d_4$  (400 MHz)

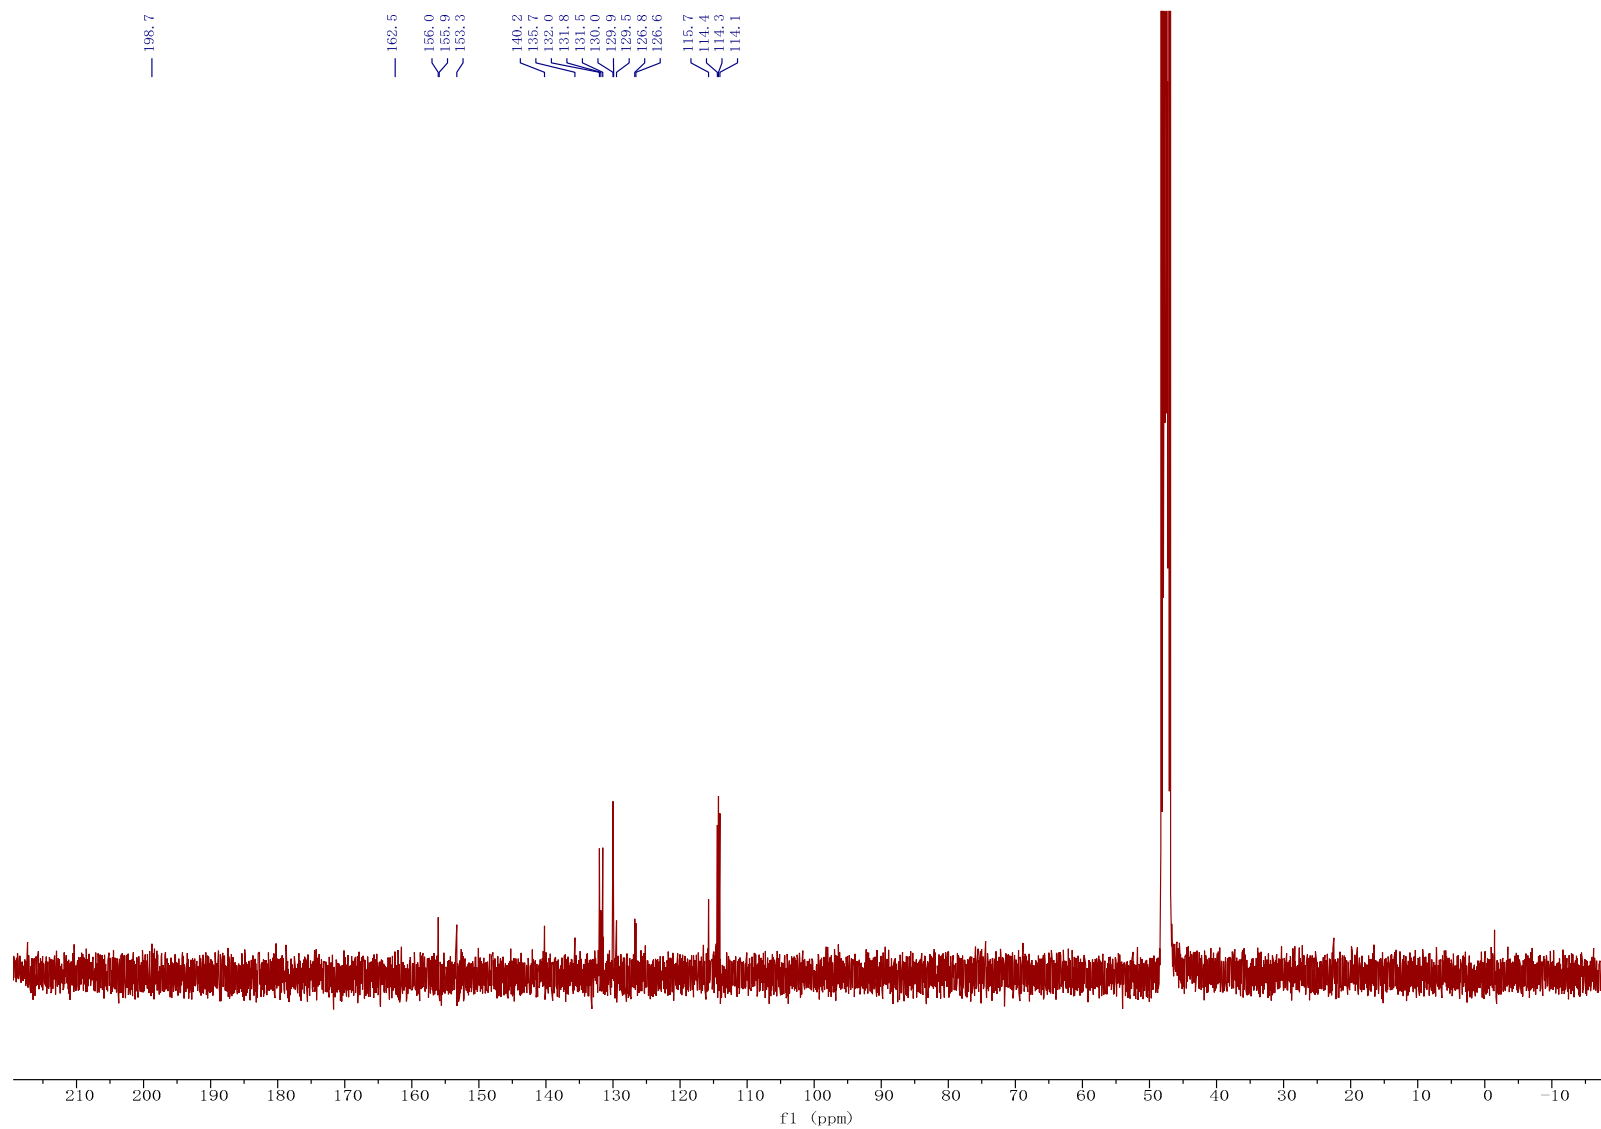

**Figure S2:** <sup>13</sup>C NMR spectrum of **1** in MeOH-*d*<sub>4</sub> (100 MHz)

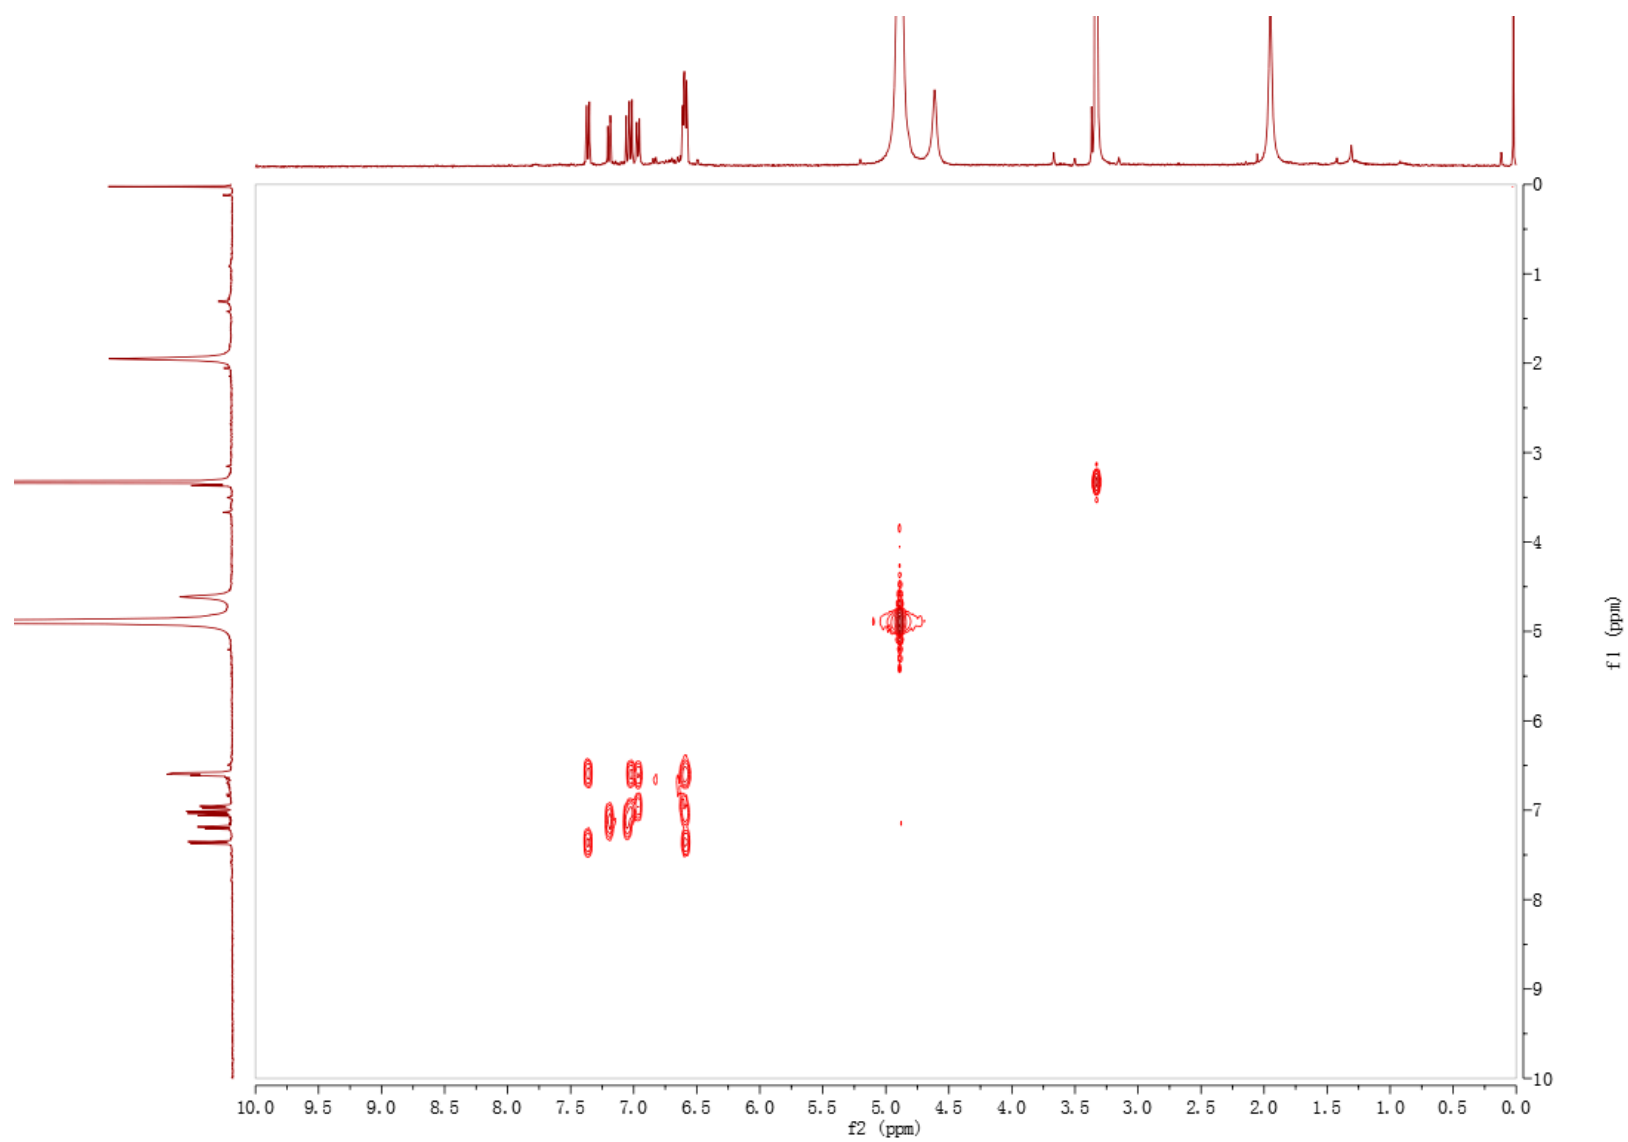

**Figure S3:**  $^1\text{H}$ - $^1\text{H}$  COSY spectrum of **1** in  $\text{MeOH-}d_4$

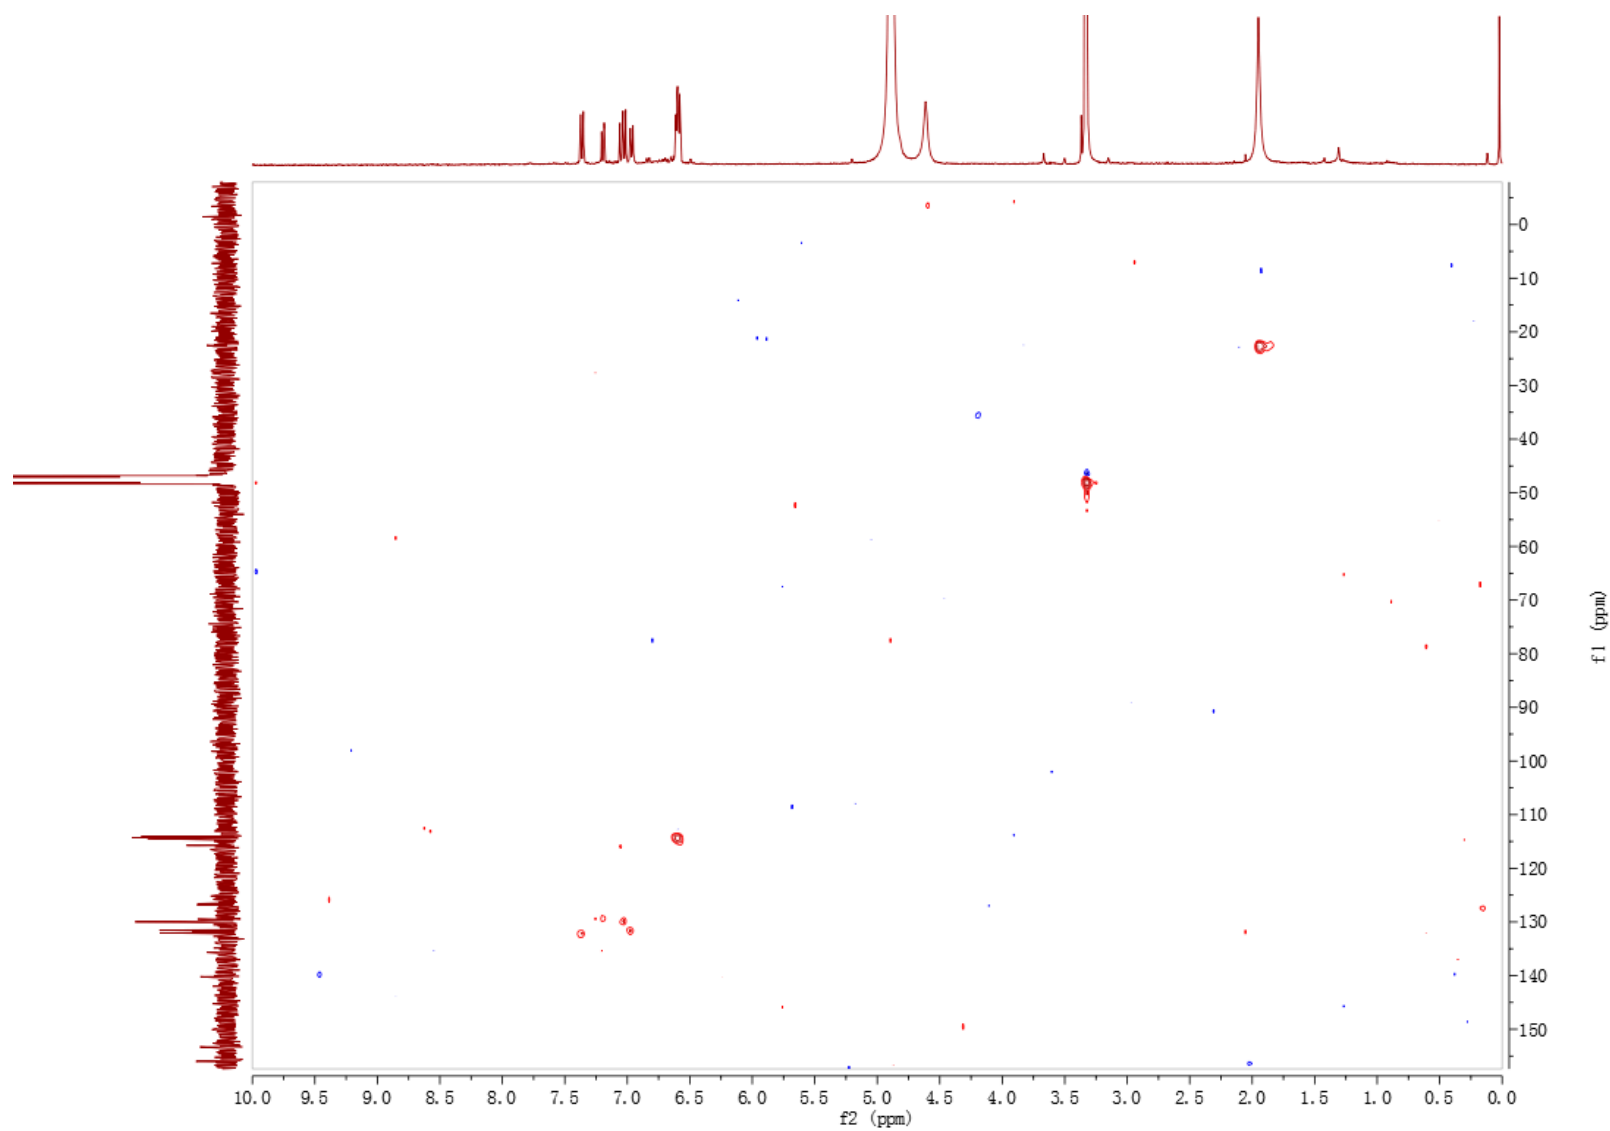

**Figure S4:** HSQC spectrum of compound **1** in  $\text{MeOH-}d_4$

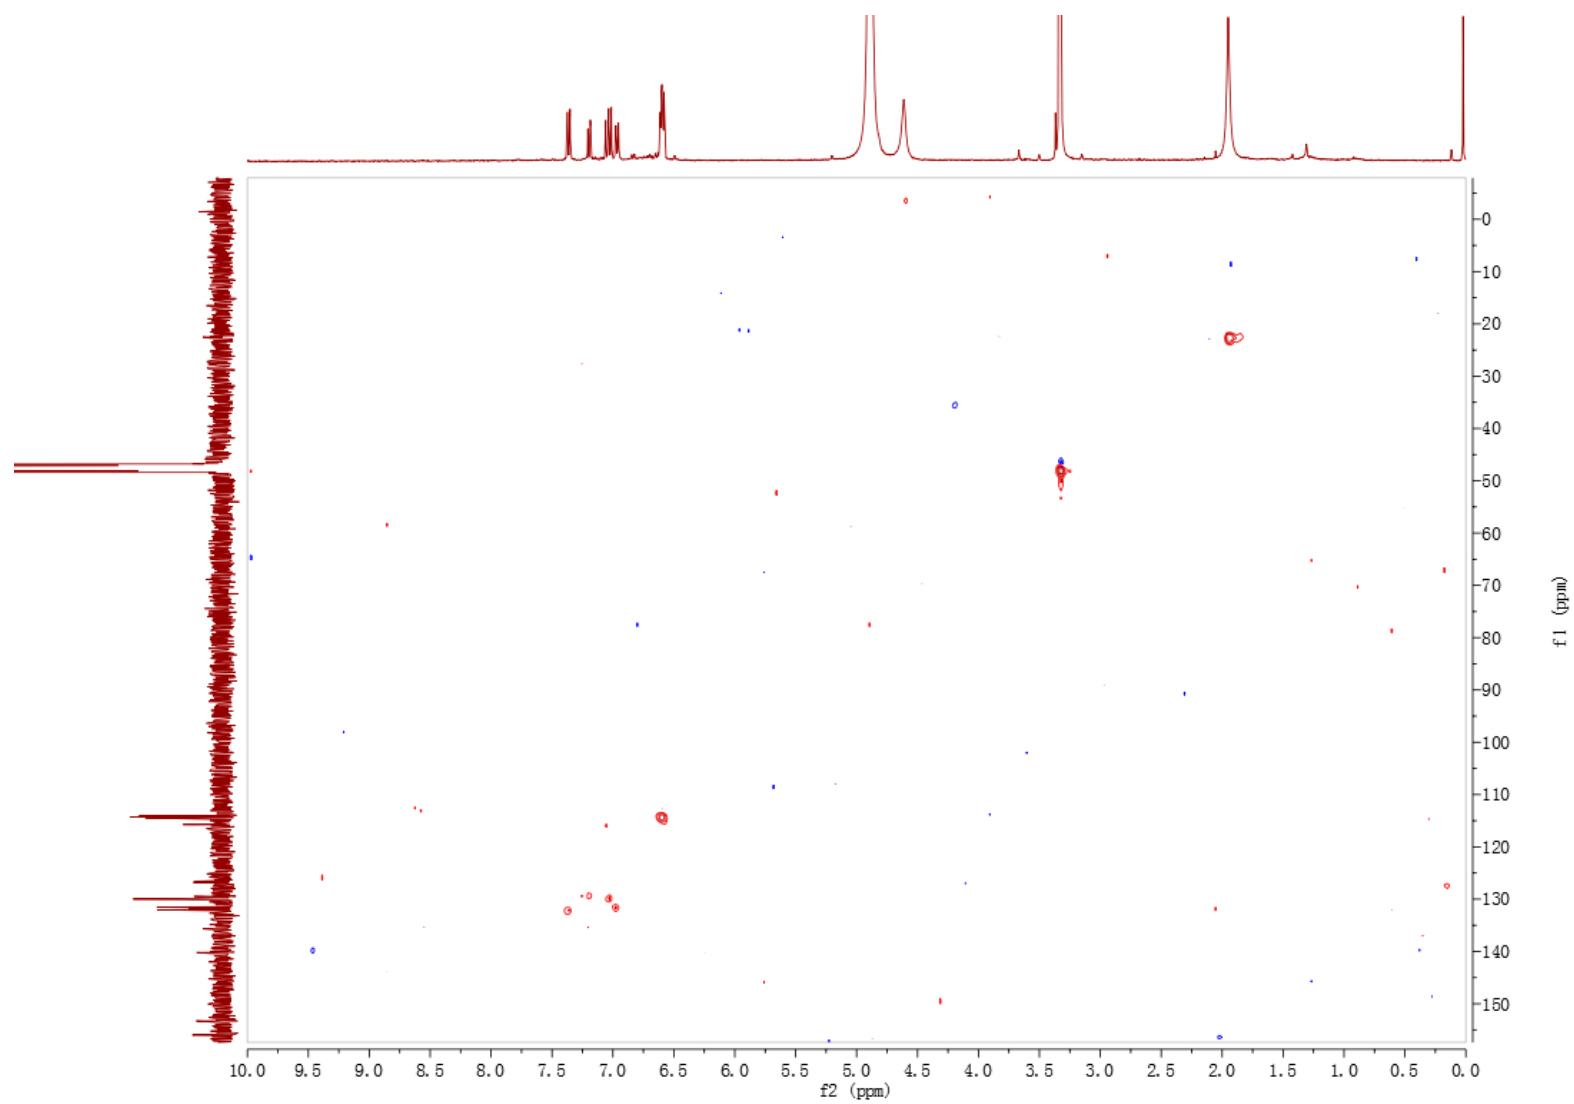

**Figure S5:** HMBC spectrum of **1** in MeOH-*d*<sub>4</sub>

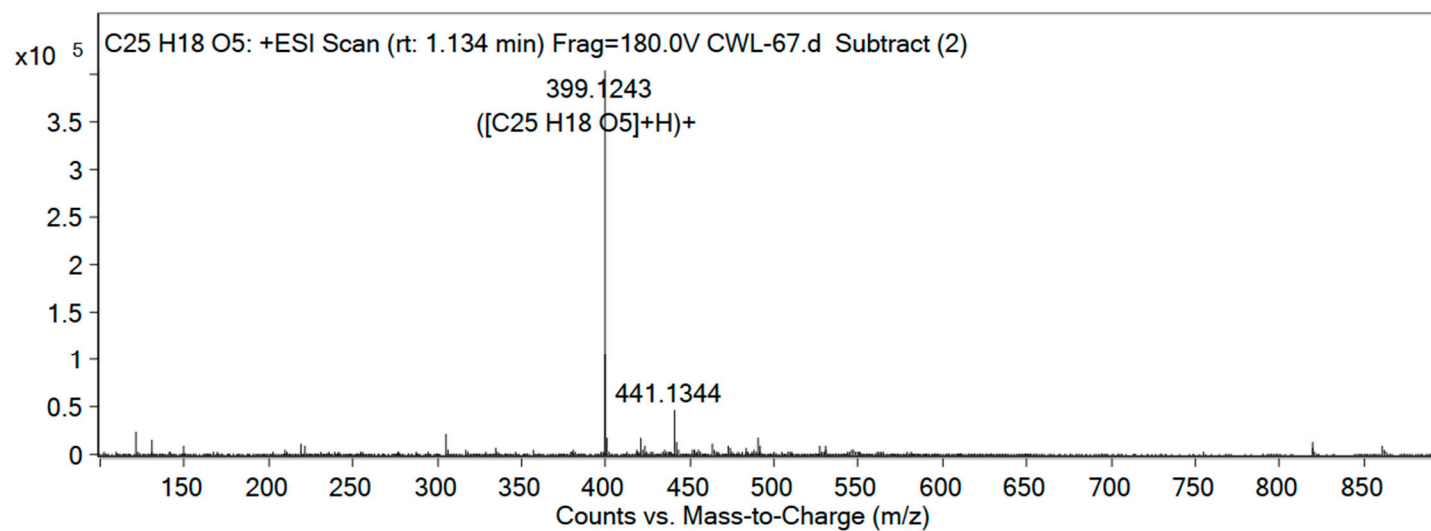

**Figure S6.** HR-ESI-MS spectrum of **1**.

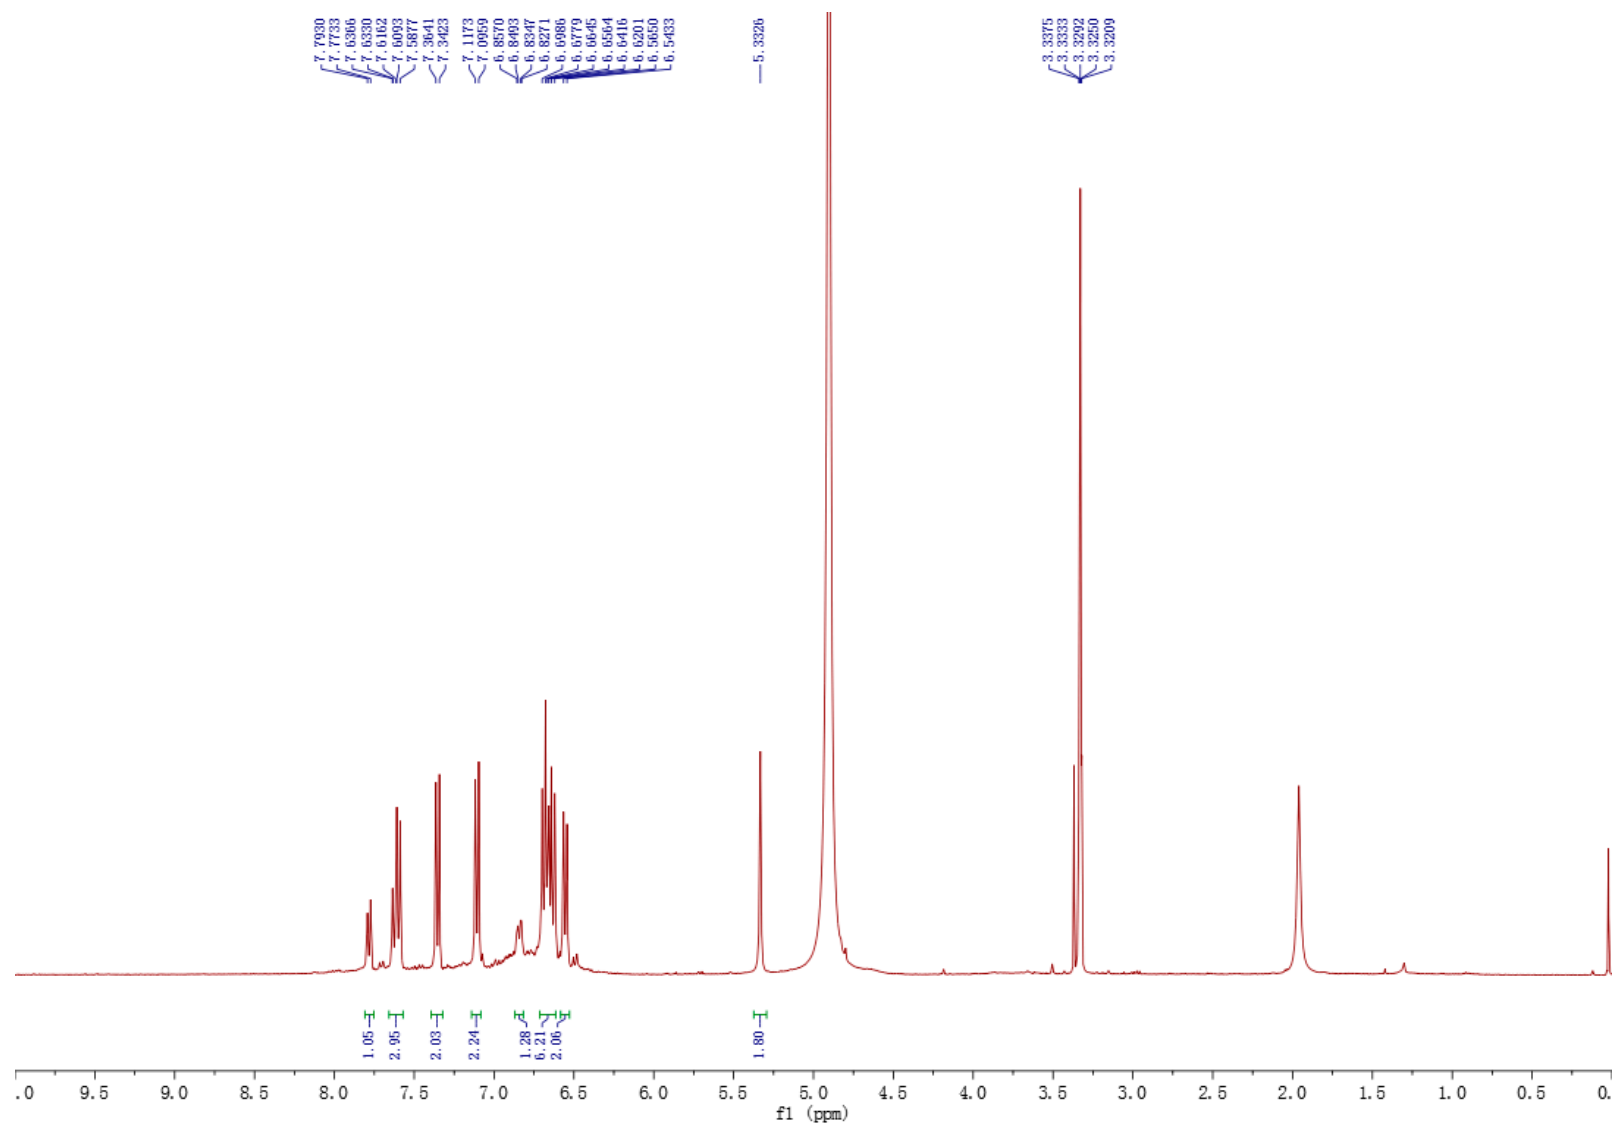

**Figure S7:** <sup>1</sup>H NMR spectrum of **2** in MeOH-*d*<sub>4</sub> (400 MHz).

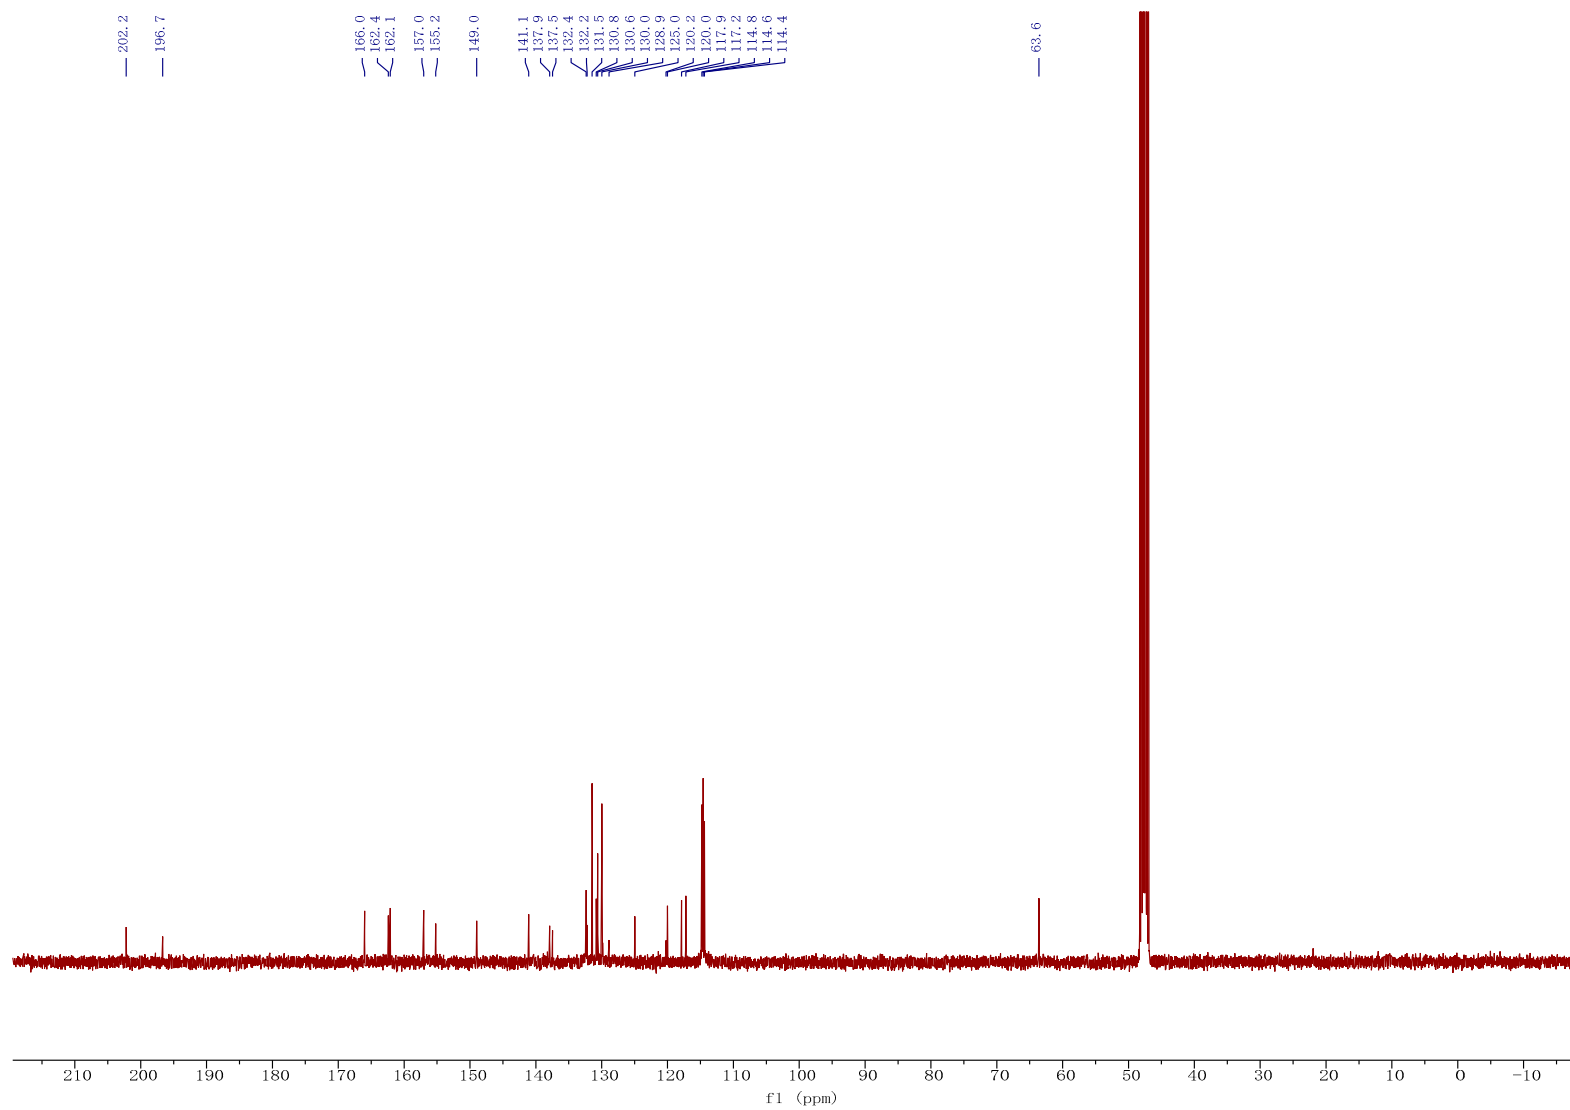

**Figure S8:**  $^{13}\text{C}$  NMR spectrum of **2** in  $\text{MeOH-}d_4$  (100 MHz)

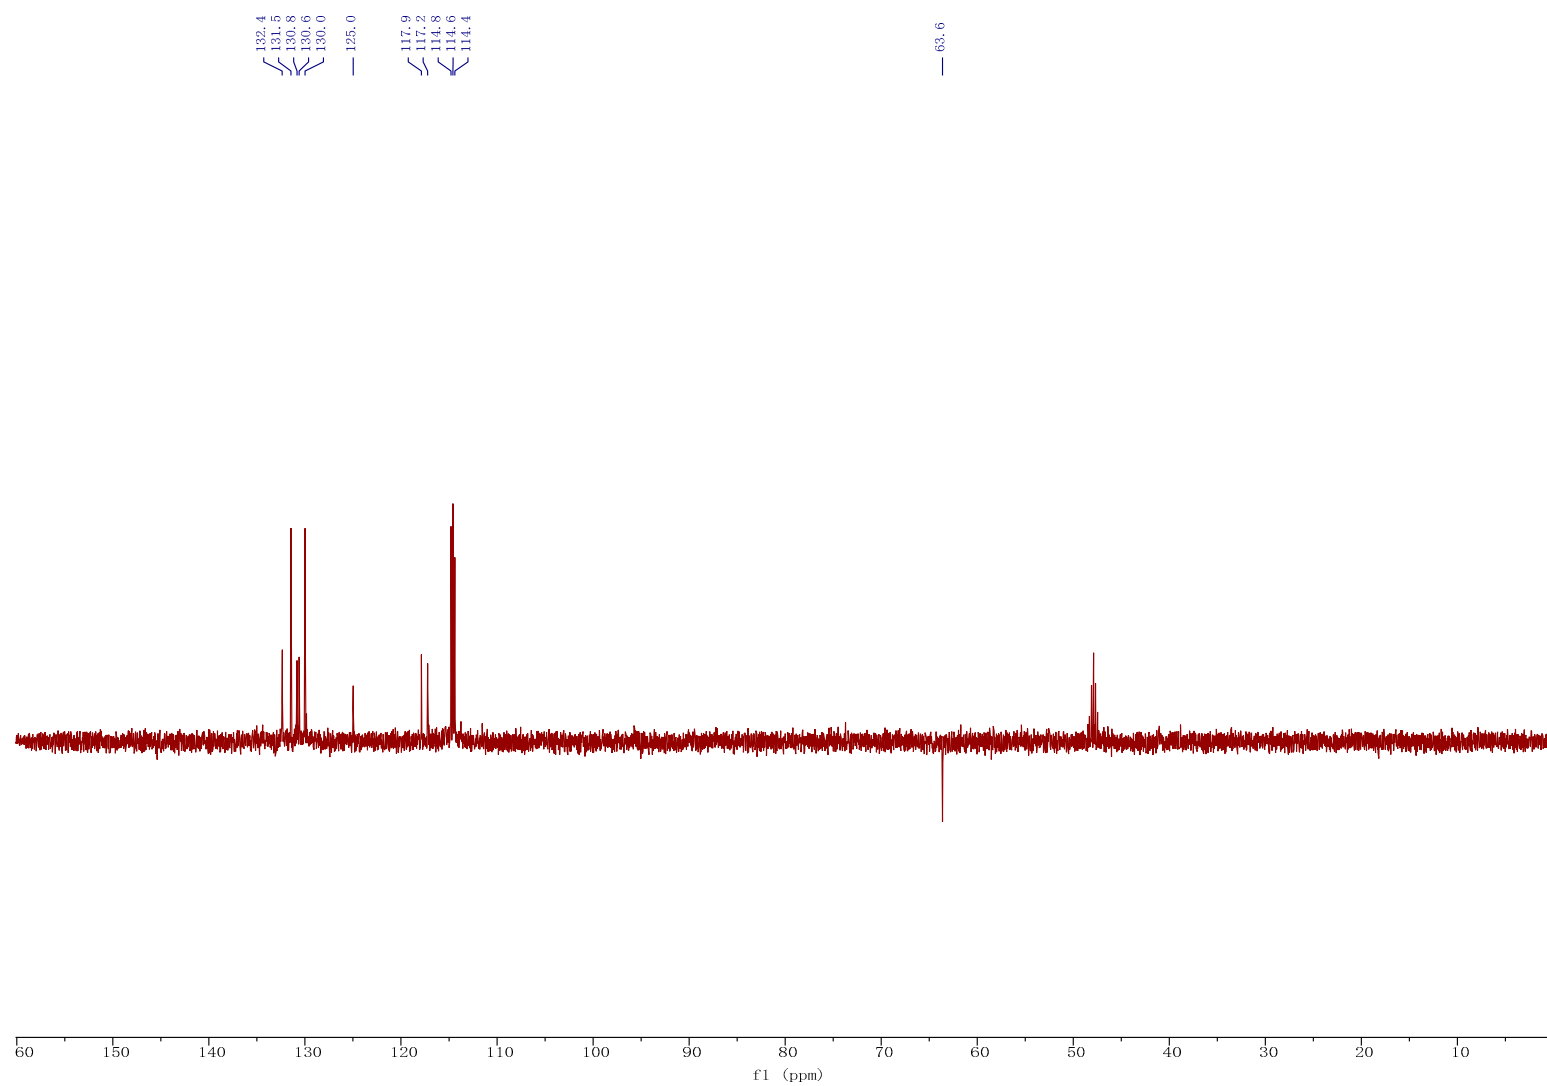

**Figure S9:** DEPT spectrum of **2** in  $\text{MeOH-}d_4$  (100 MHz)

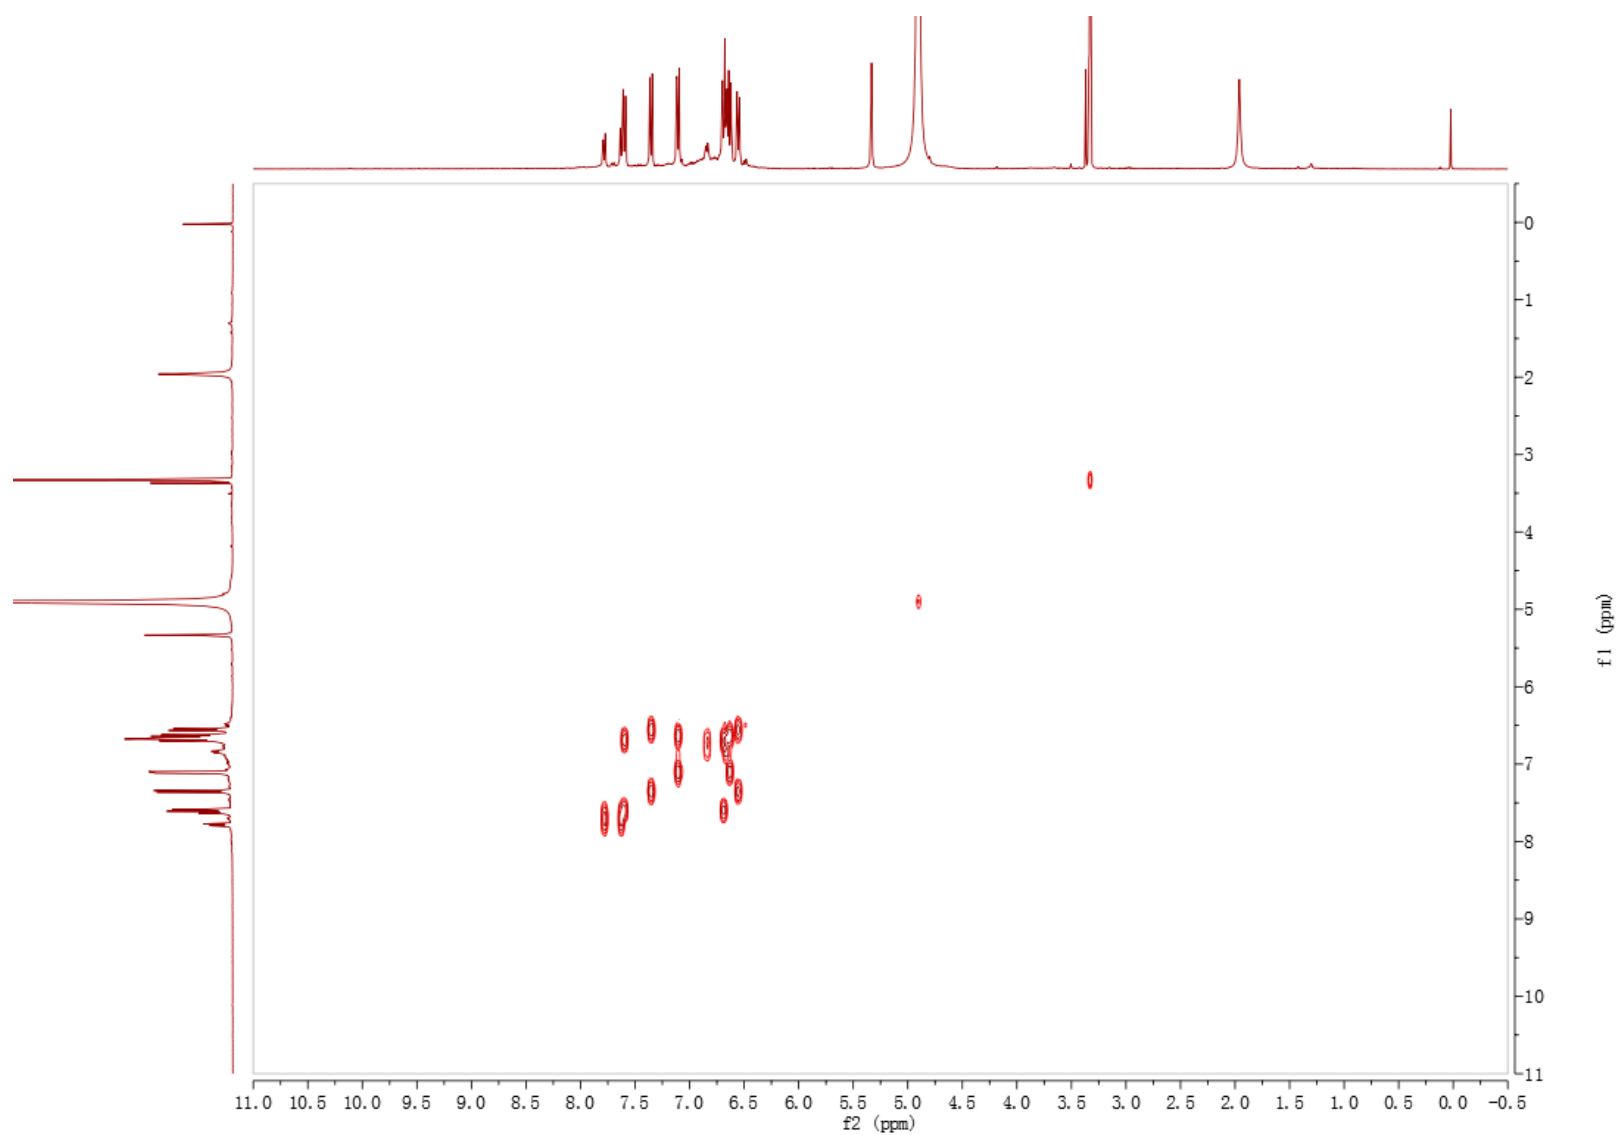

**Figure S10:**  $^1\text{H}$ - $^1\text{H}$  COSY spectrum of **2** in  $\text{MeOH-}d_4$

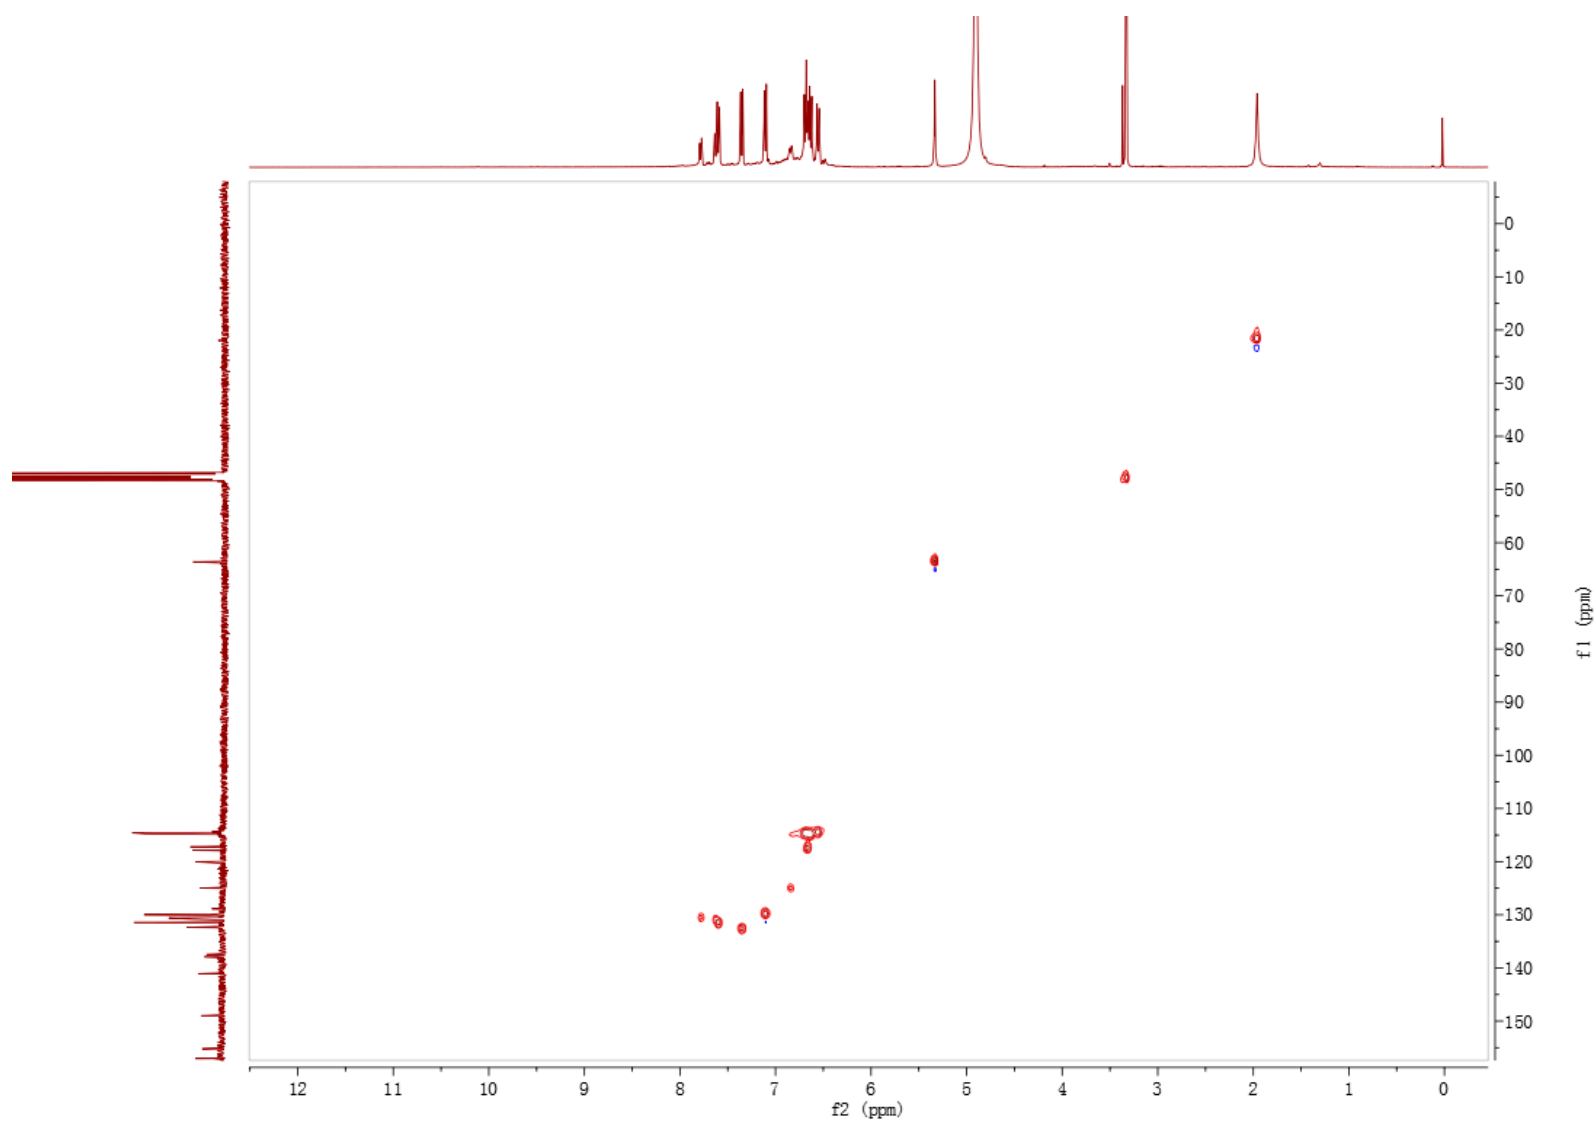

**Figure S11:** HSQC spectrum of compound **2** in MeOH- $d_4$

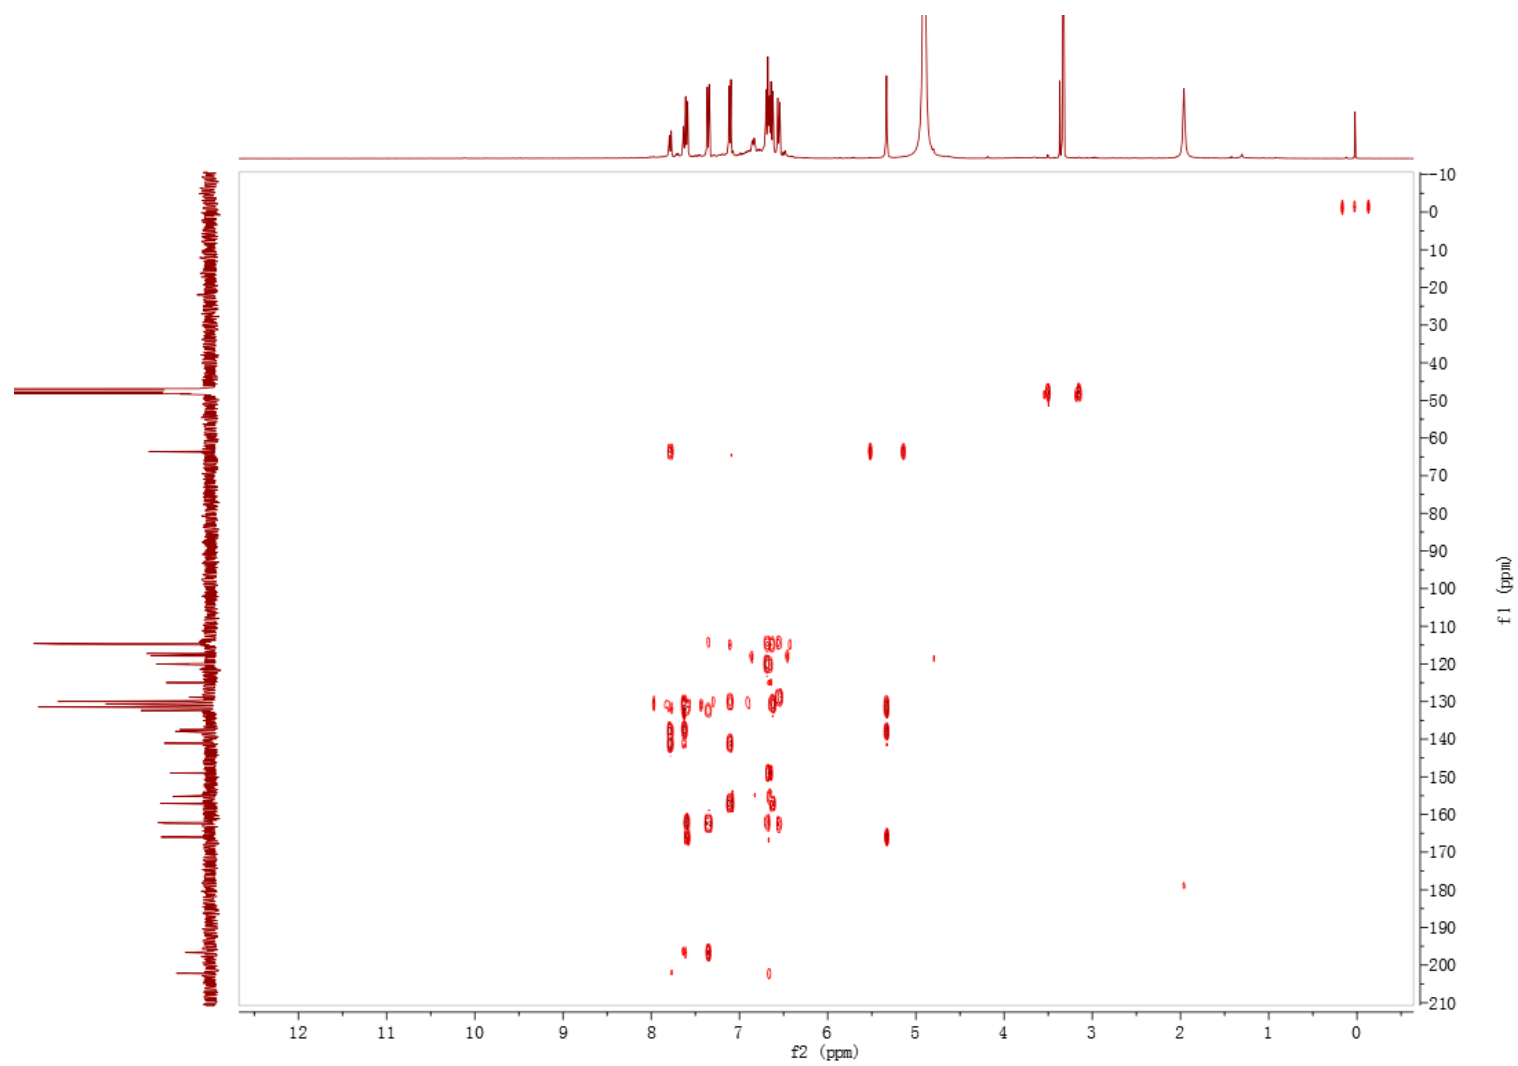

**Figure S12:** HMBC spectrum of compound **2** in MeOH-*d*<sub>4</sub>

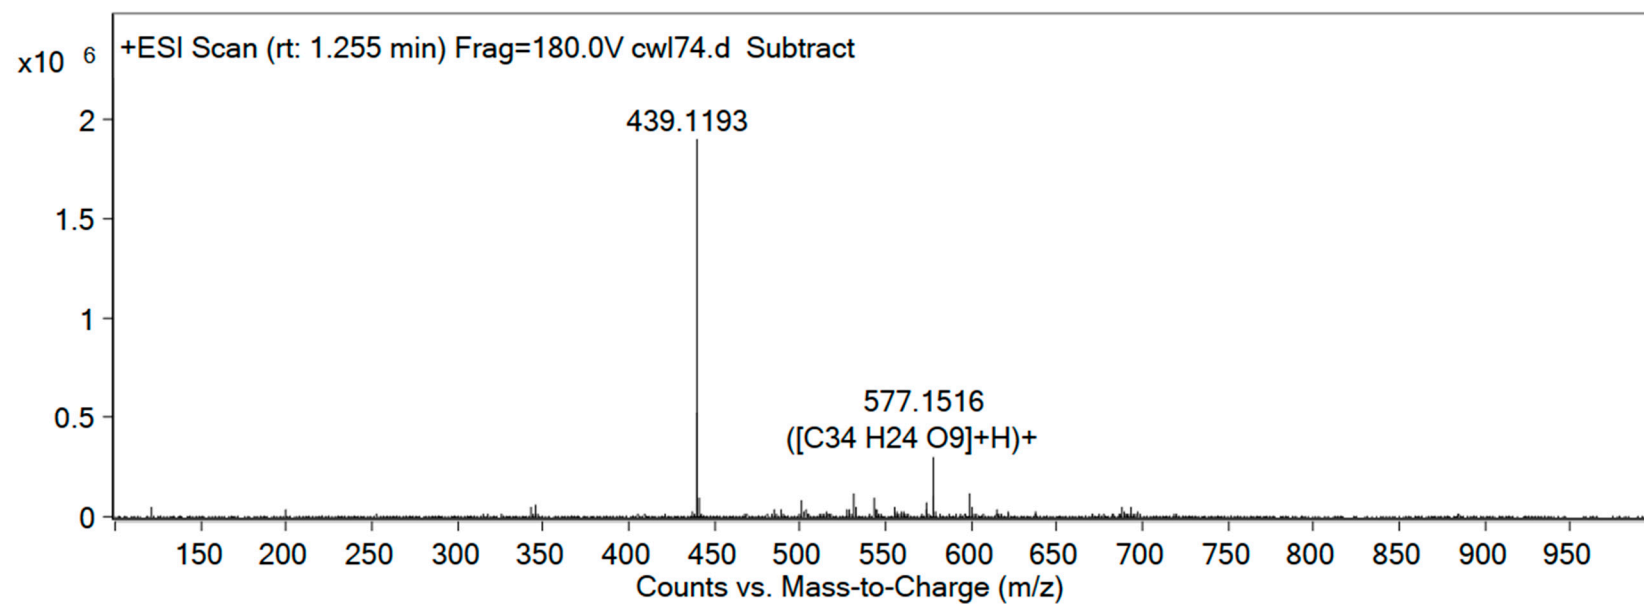

**Figure S13:** HR-ESI-MS spectrum of **2**

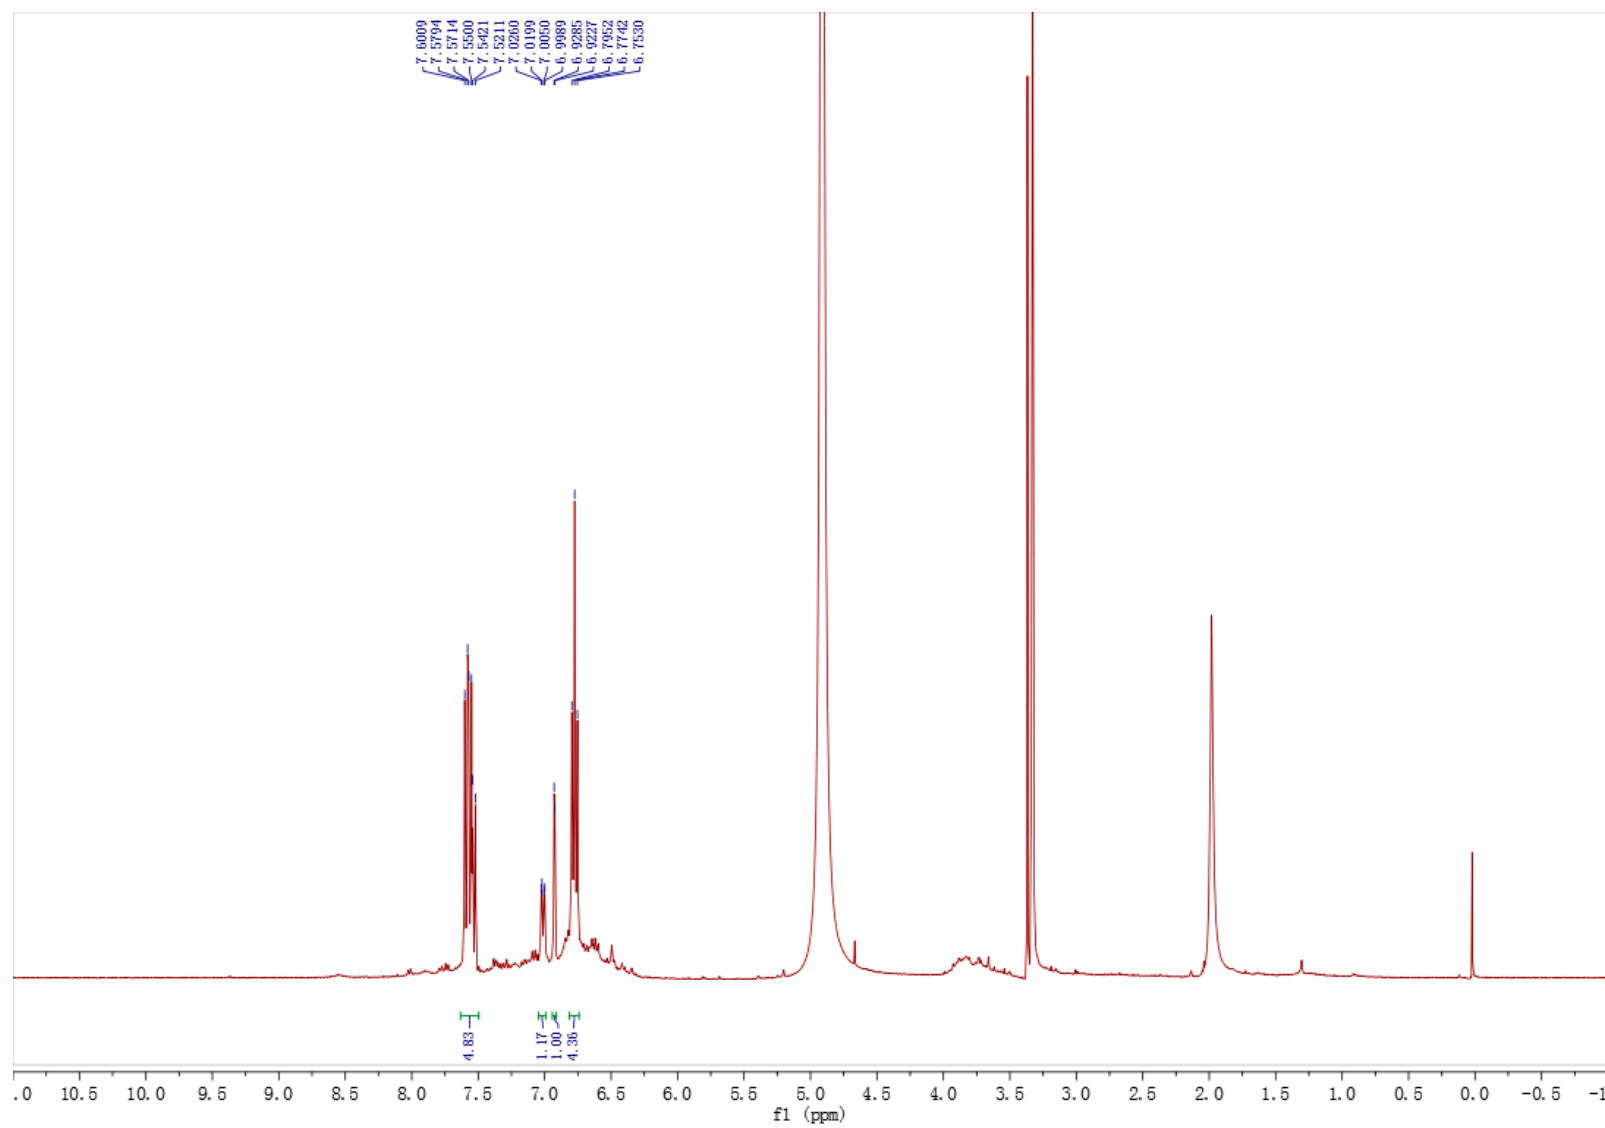

**Figure S14:**  $^1\text{H}$  NMR spectrum of **3** in  $\text{MeOH-}d_4$  (400 MHz).

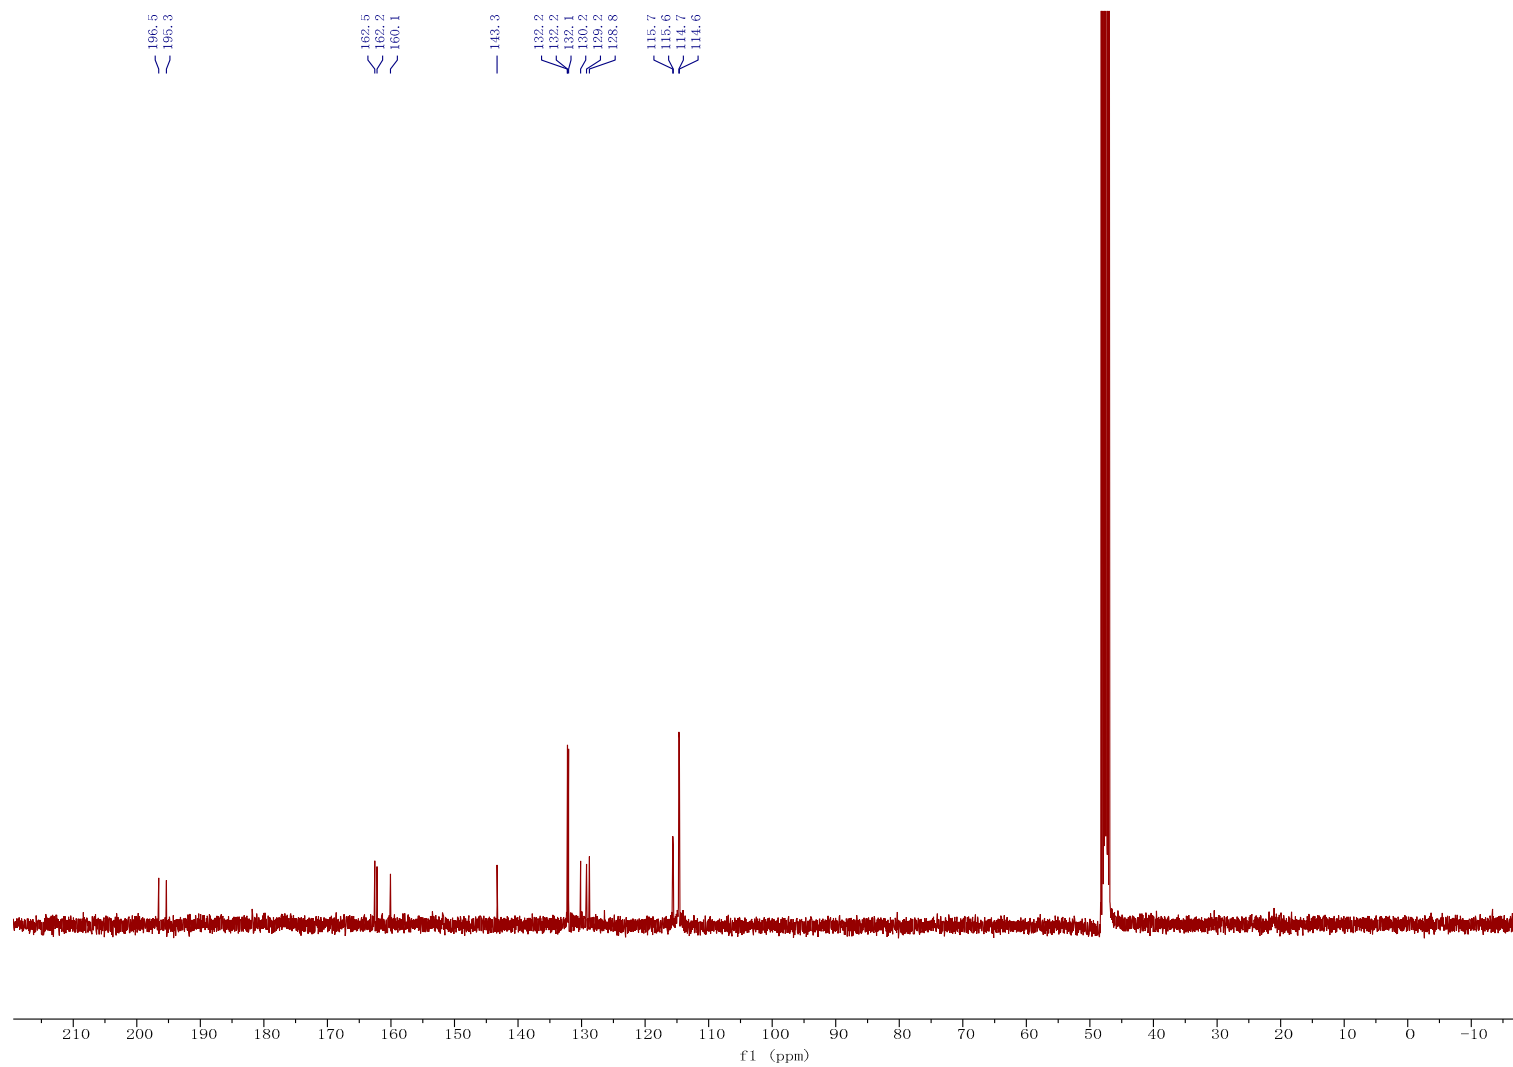

**Figure S15:**  $^{13}\text{C}$  NMR spectrum of **3** in  $\text{MeOH-}d_4$  (100 MHz).

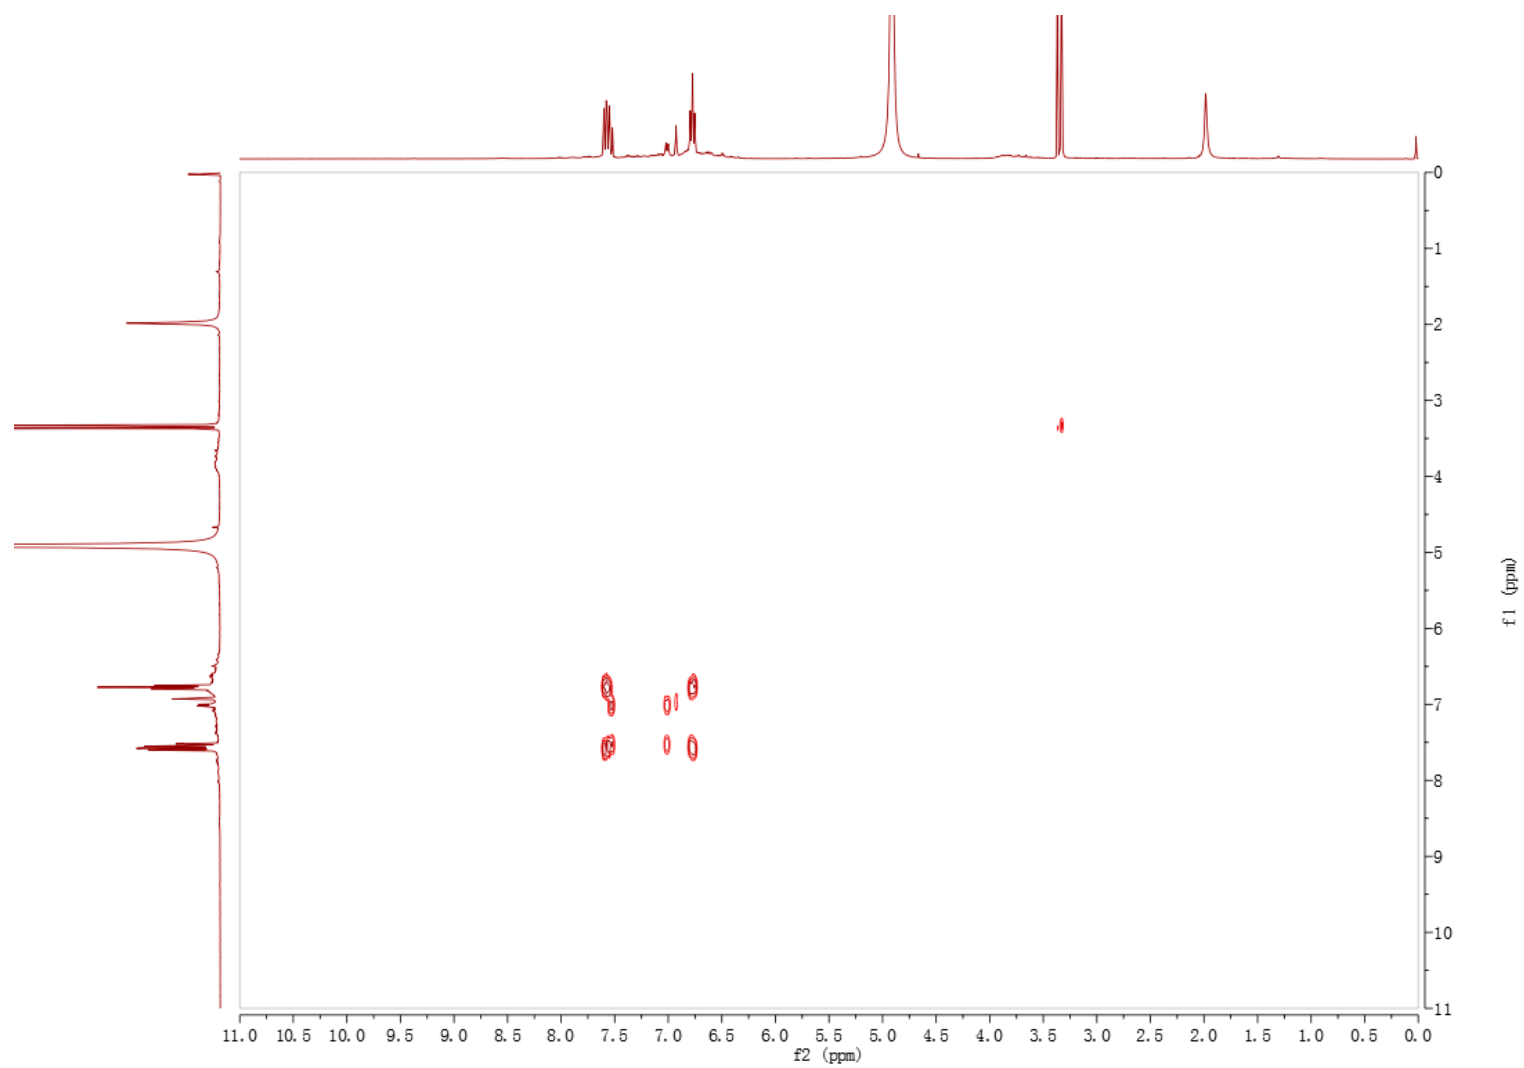

**Figure S16:**  $^1\text{H}$ - $^1\text{H}$  COSY spectrum of **3** in  $\text{MeOH-}d_4$ .

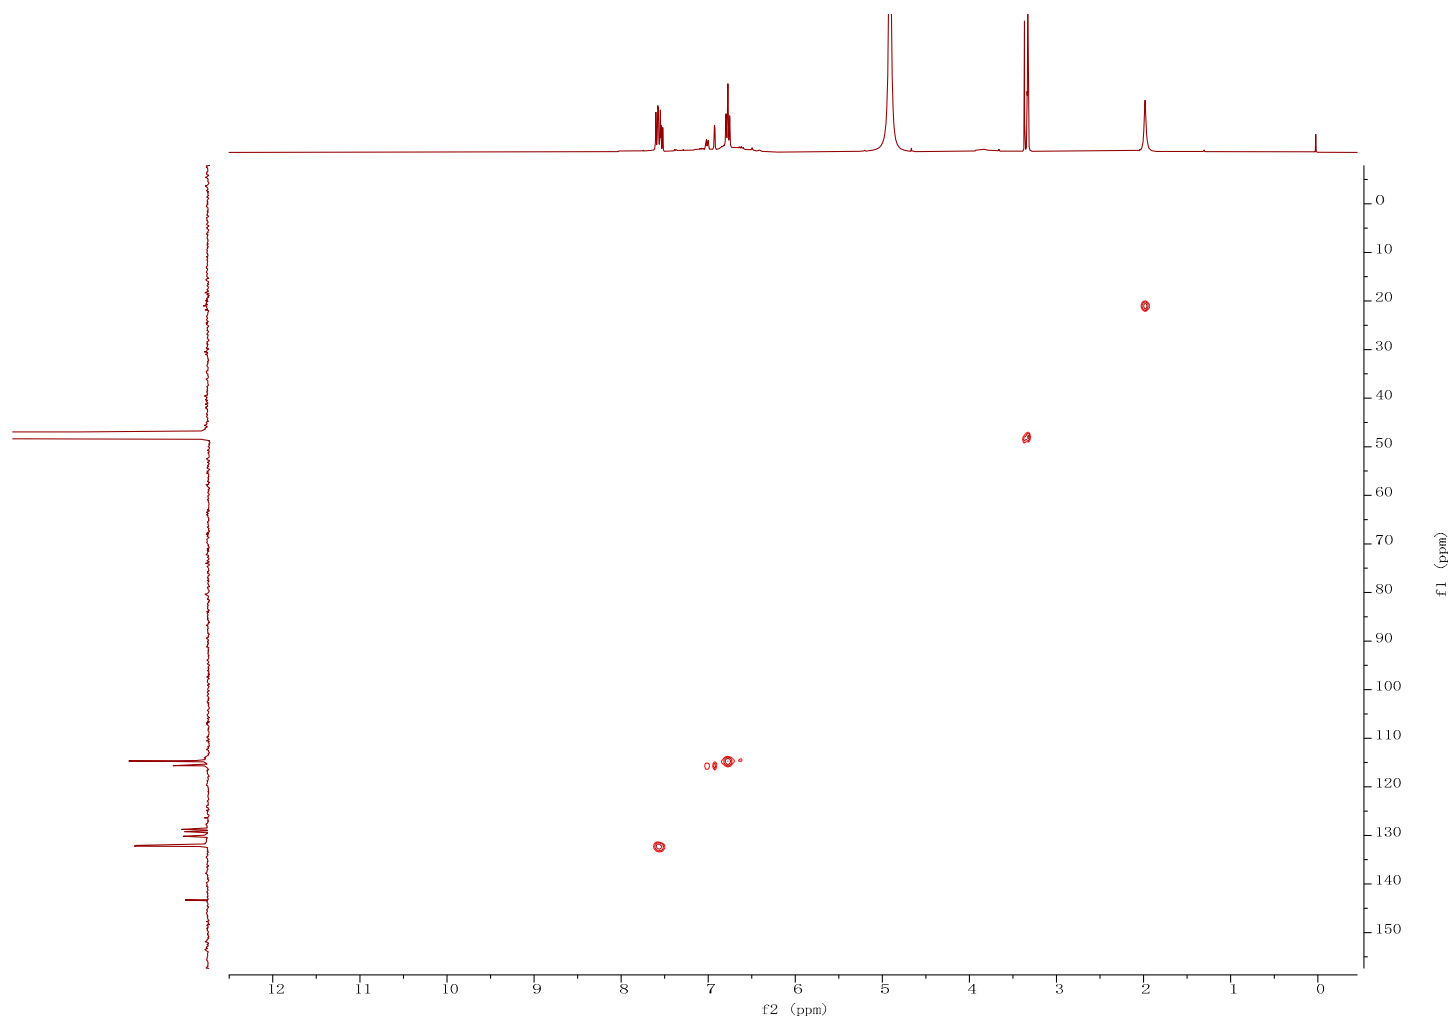

**Figure S17:** HSQC spectrum of compound **3** in MeOH-*d*<sub>4</sub>.

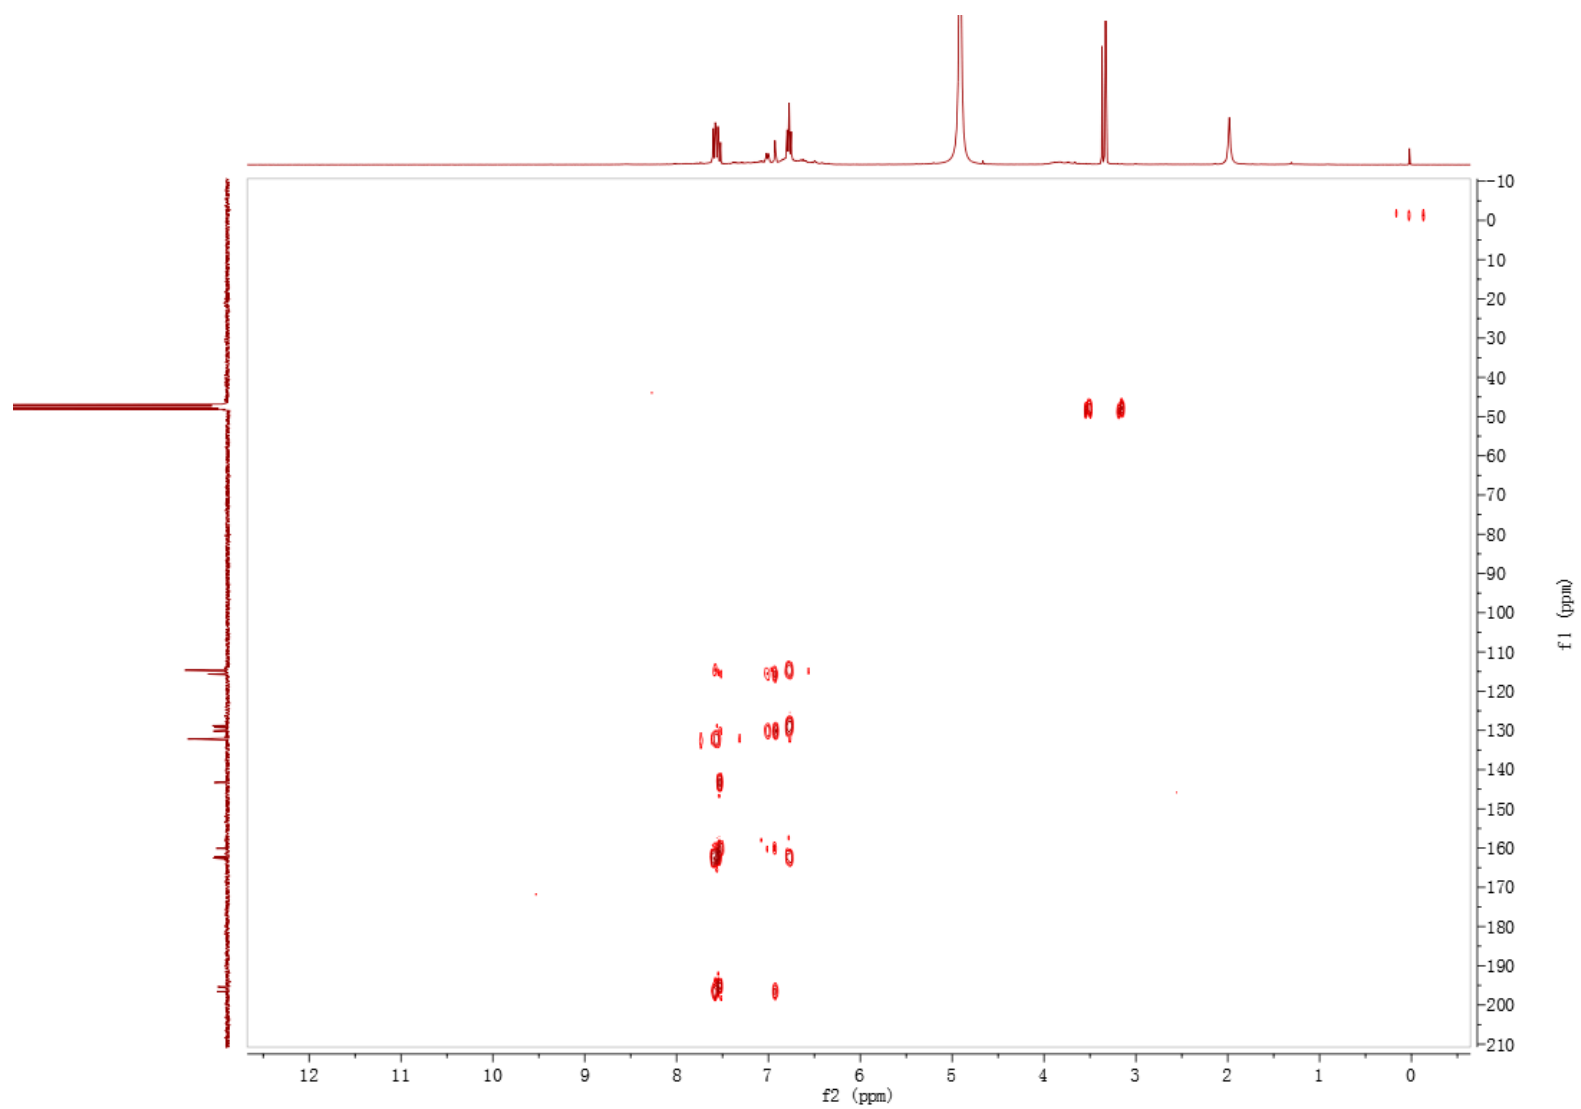

**Figure S18:** HMBC spectrum of compound **3** in MeOH- $d_4$ .

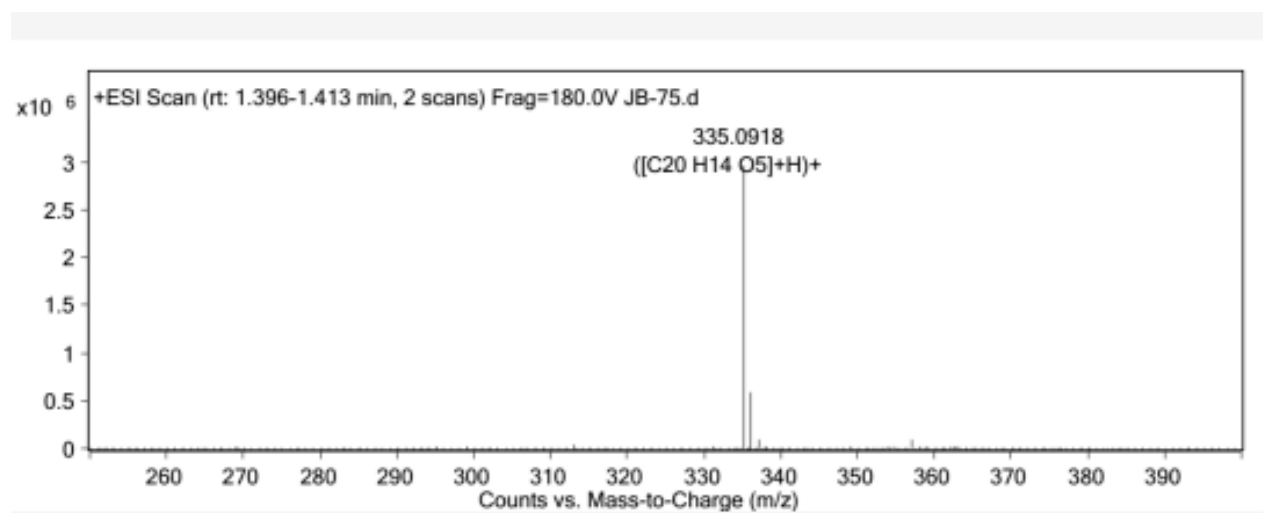

**Figure S19:** HR-ESI-MS spectrum of **3**.

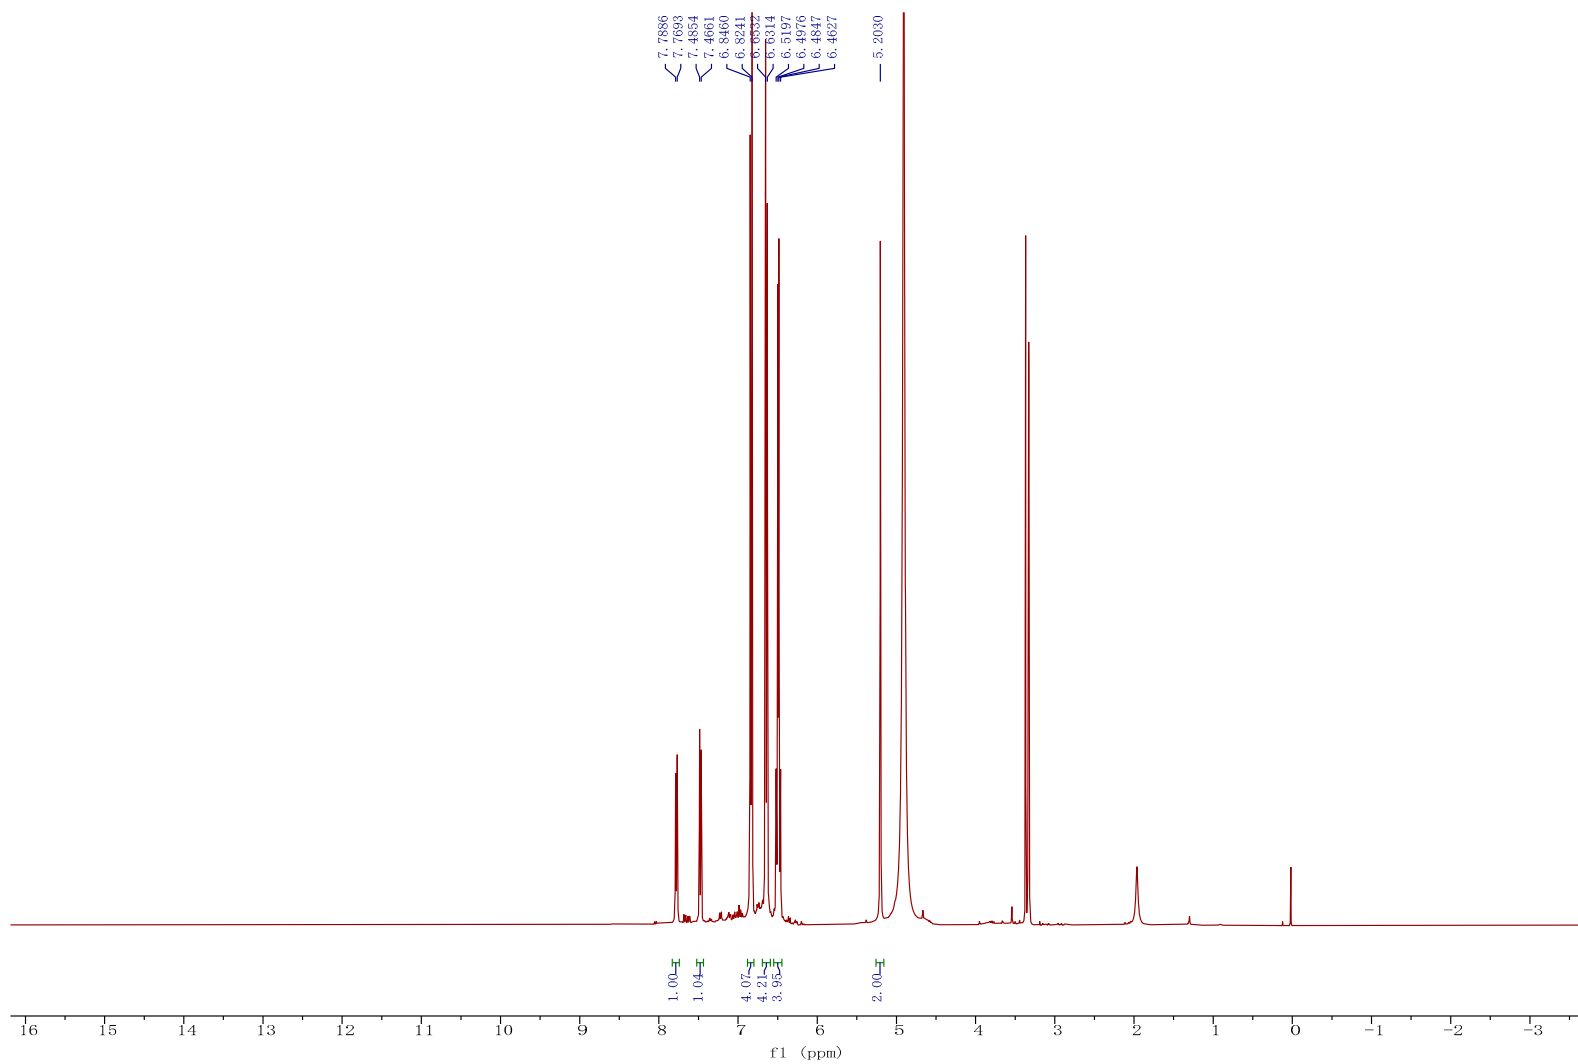

**Figure S20:** <sup>1</sup>H NMR spectrum of **4** in MeOH-*d*<sub>4</sub> (400 MHz).

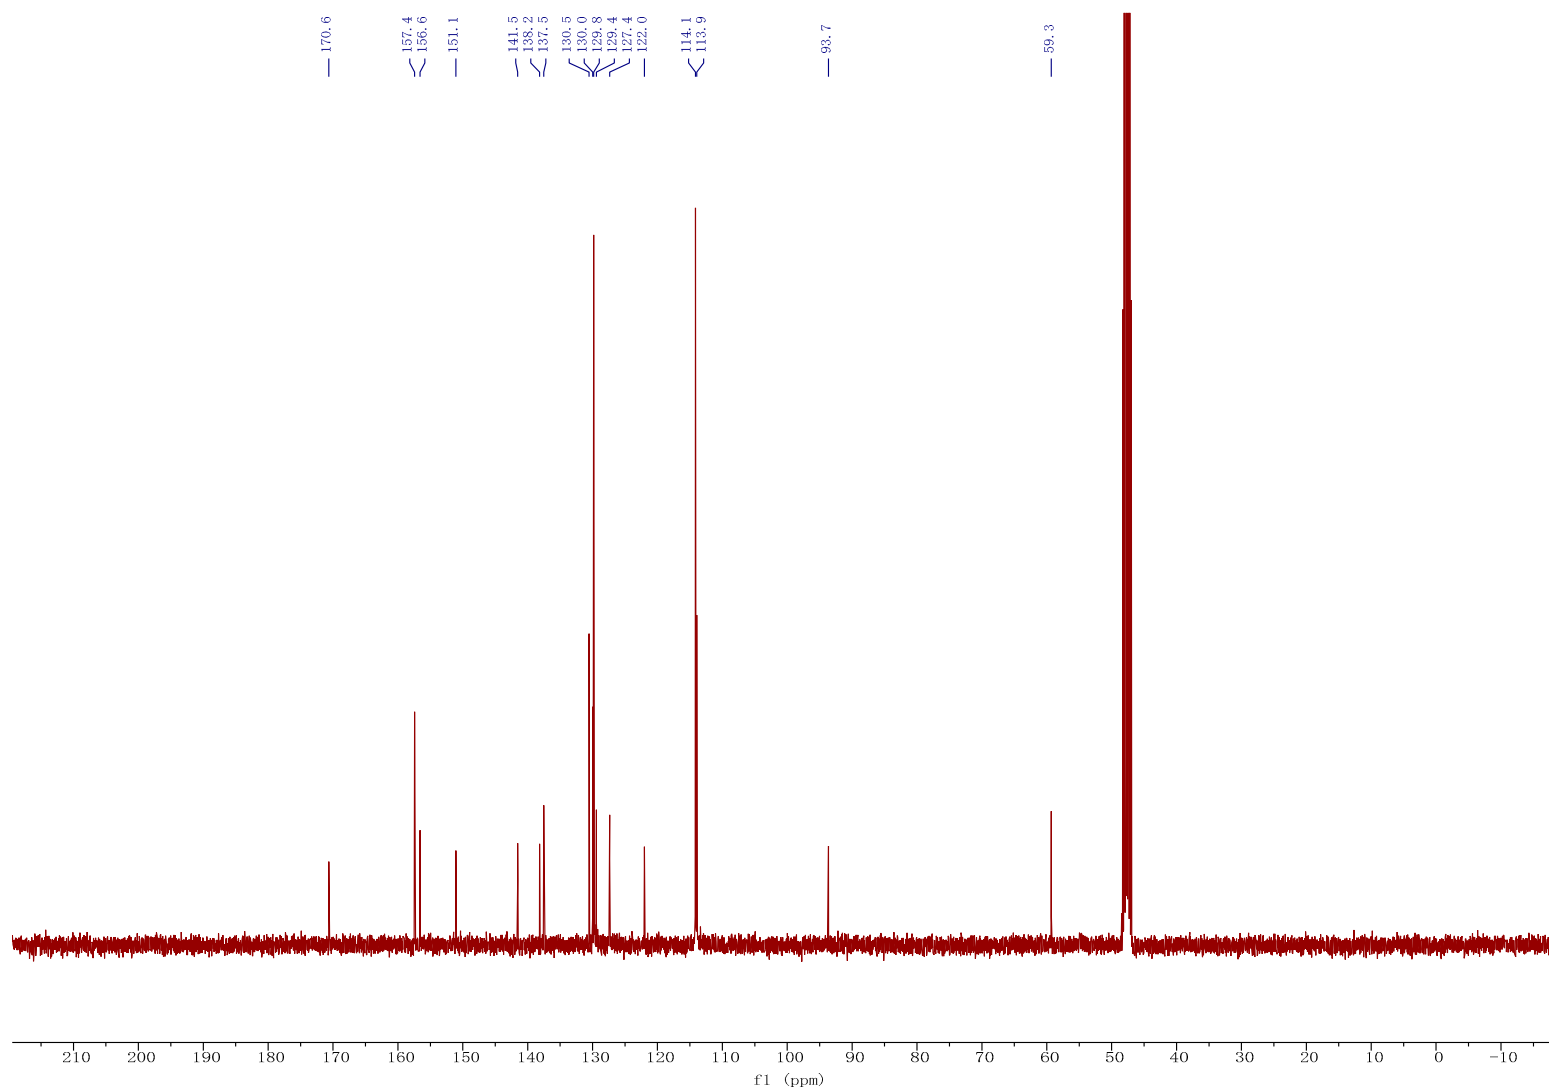

**Figure S21:** <sup>13</sup>C NMR spectrum of **4** in MeOH-*d*<sub>4</sub> (100 MHz).

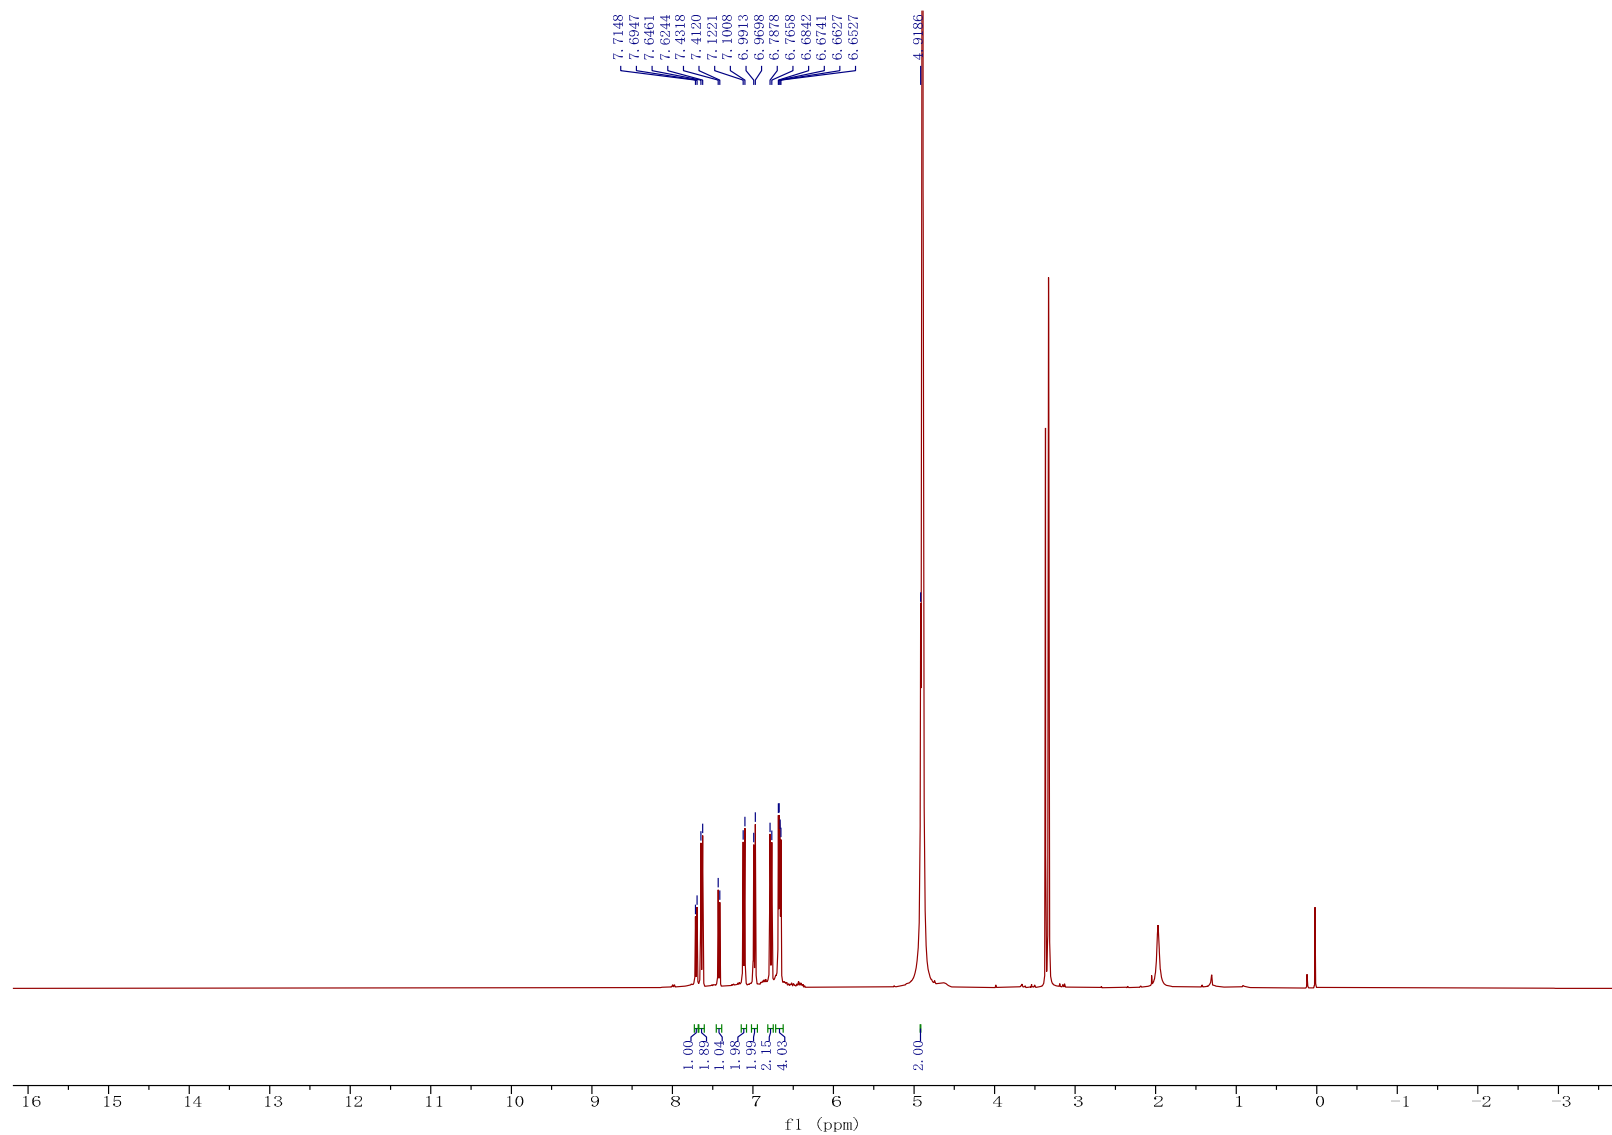

**Figure S22:** <sup>1</sup>H NMR spectrum of **5** in MeOH-*d*<sub>4</sub> (400 MHz).

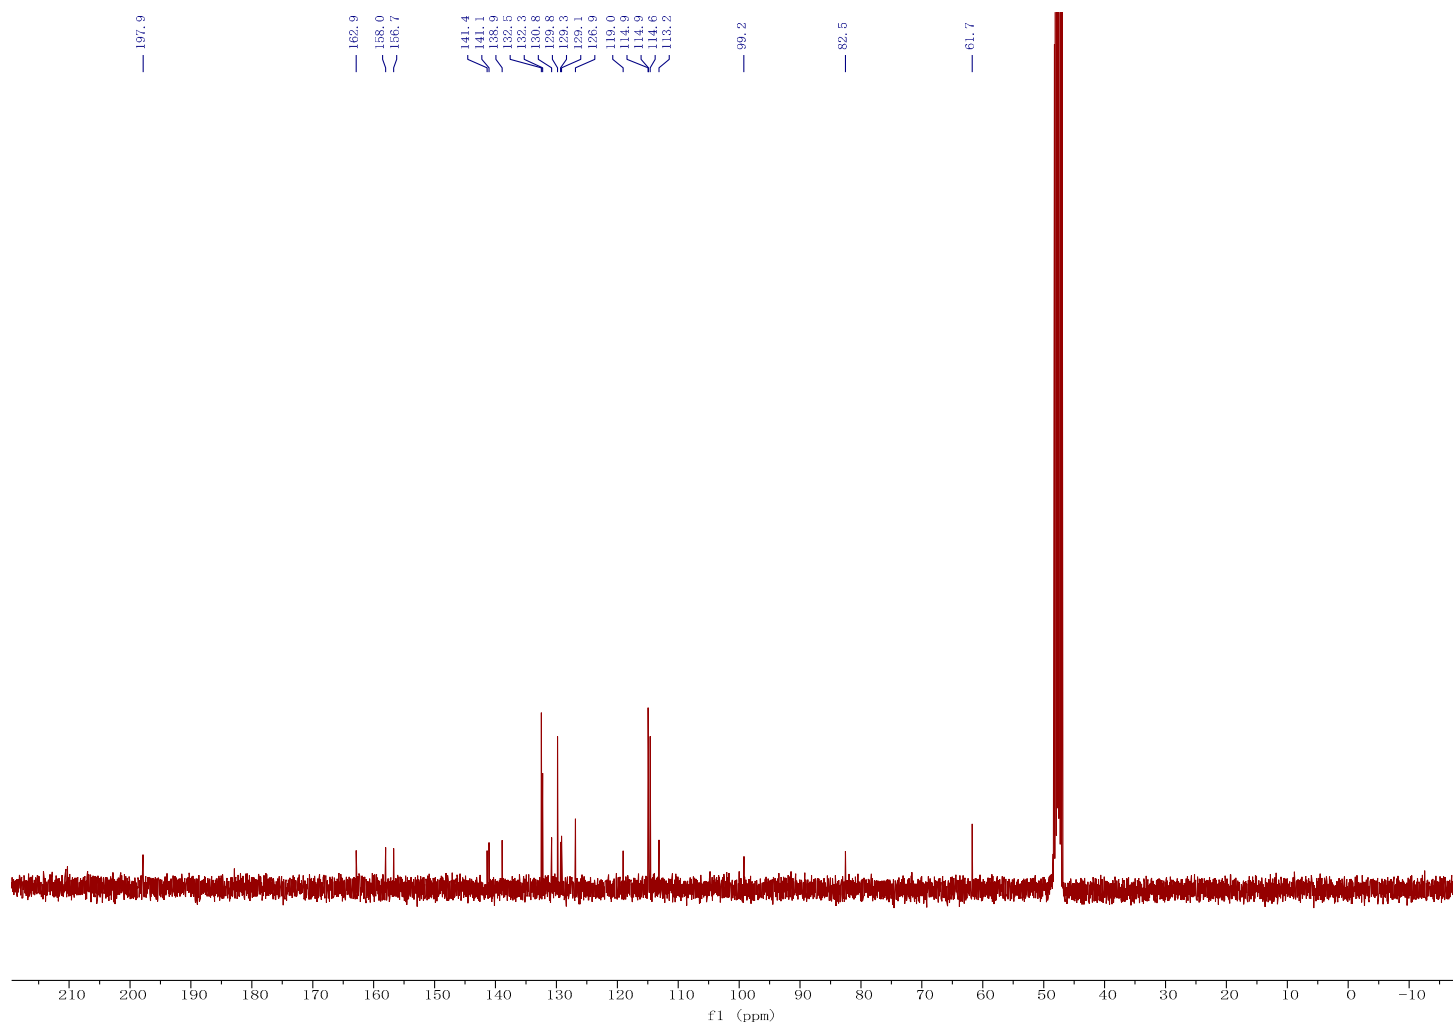

**Figure S23:** <sup>13</sup>C NMR spectrum of **5** in MeOH-*d*<sub>4</sub> (100 MHz).

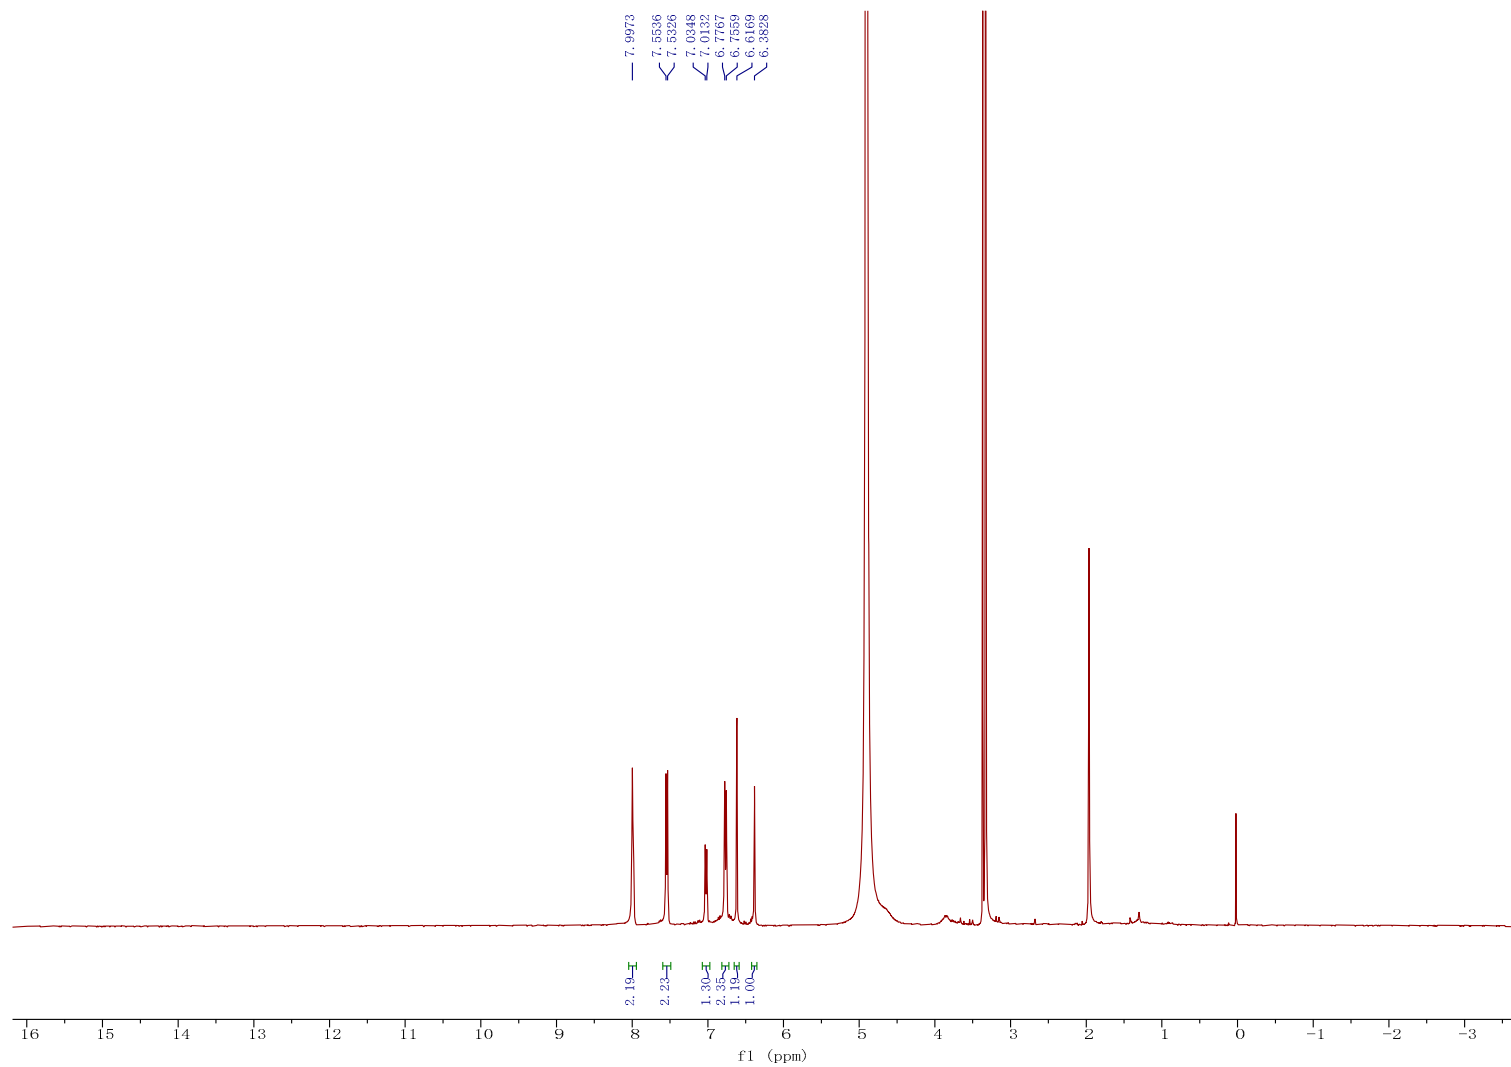

**Figure S24:** <sup>1</sup>H NMR spectrum of **6** in MeOH-*d*<sub>4</sub> (400 MHz).

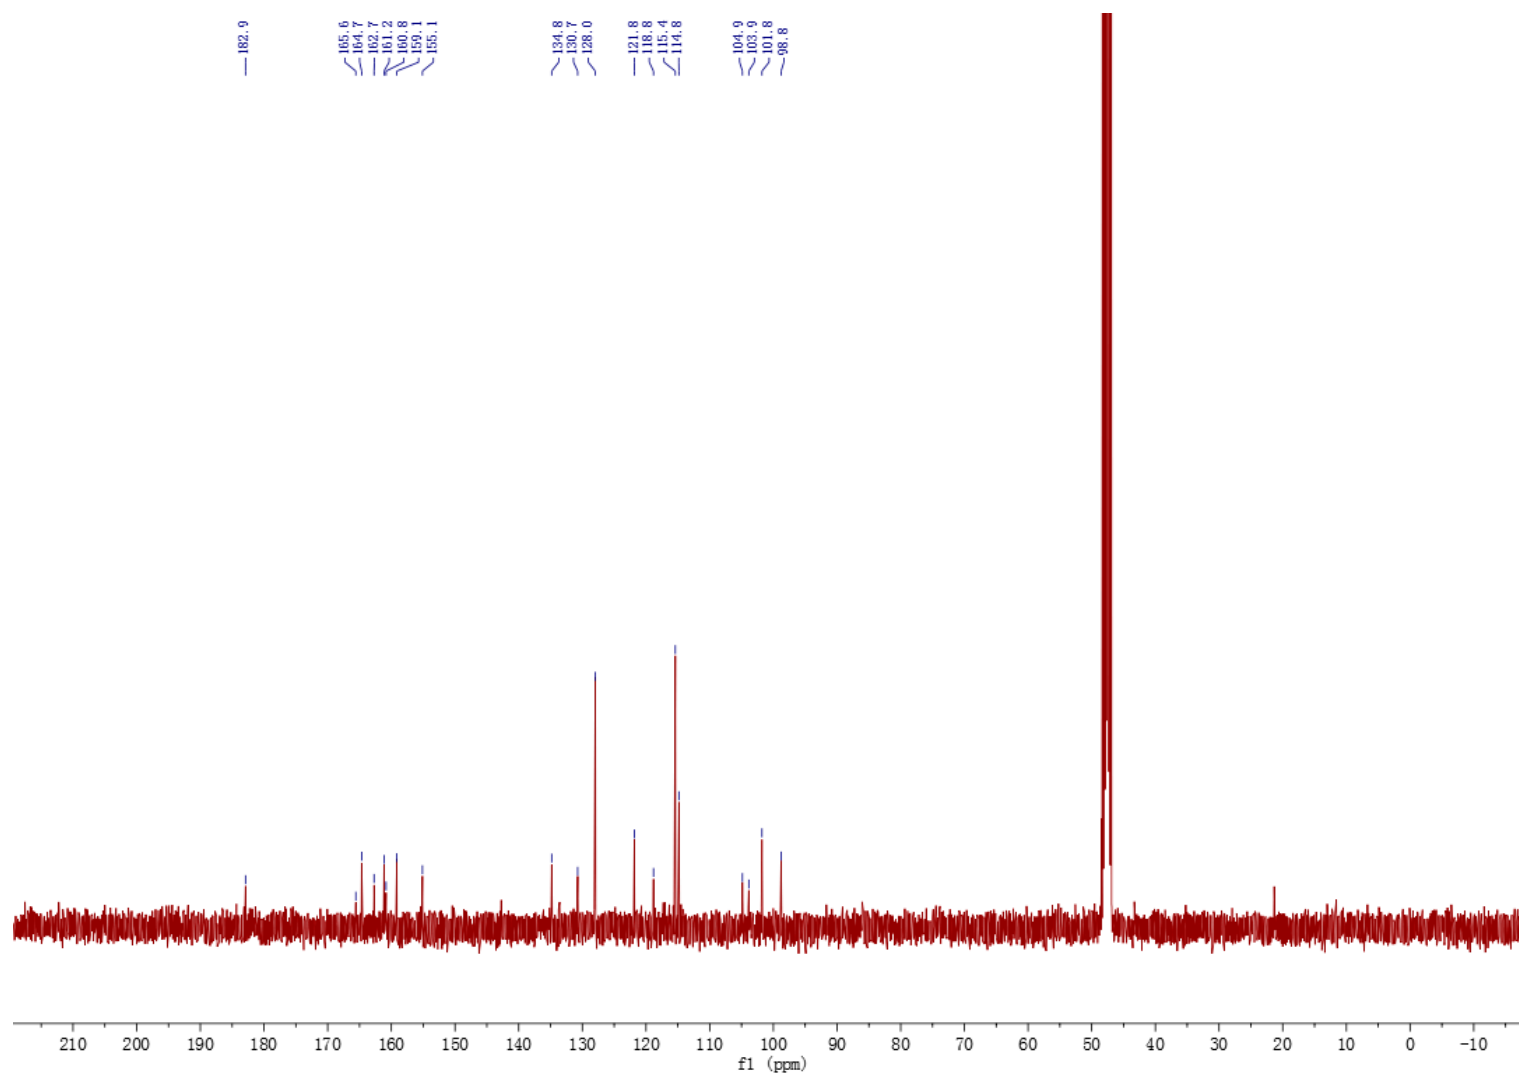

**Figure S25:**  $^1\text{H}$  NMR spectrum of **6** in  $\text{MeOH-}d_4$  (400 MHz).
